# Supplementary material for: Phase transformation and room temperature stabilization of various Bi2O3 nano-polymorphs: effect of oxygen-vacancy defects and reduced surface energy due to adsorbed carbon species
Source: Royal Society of Chemistry journal article supplement (doi:10.1039/d0nr06552h), 2020-01-01
Supplement: d0nr06552h1.pdf [file d0nr06552h1.pdf]

**Phase transformation and room temperature stabilization of various Bi<sub>2</sub>O<sub>3</sub> nano-polymorphs: Effect of oxygen-vacancy defects and reduced surface energy due to adsorbed carbon species**

Ashish Chhaganlal Gandhi, Chi-Yuan Lai, Kuan-Ting Wu, P. V. R. K. Ramacharyulu, Valmiki B. Koli, Chia-Liang Cheng, Shyue-Chu Ke and Sheng Yun Wu\*

Department of Physics, National Dong Hwa University, Hualien 97401, Taiwan

**Fig. S1** Rietveld refined PXRD spectra from Bi NPs and annealed samples.

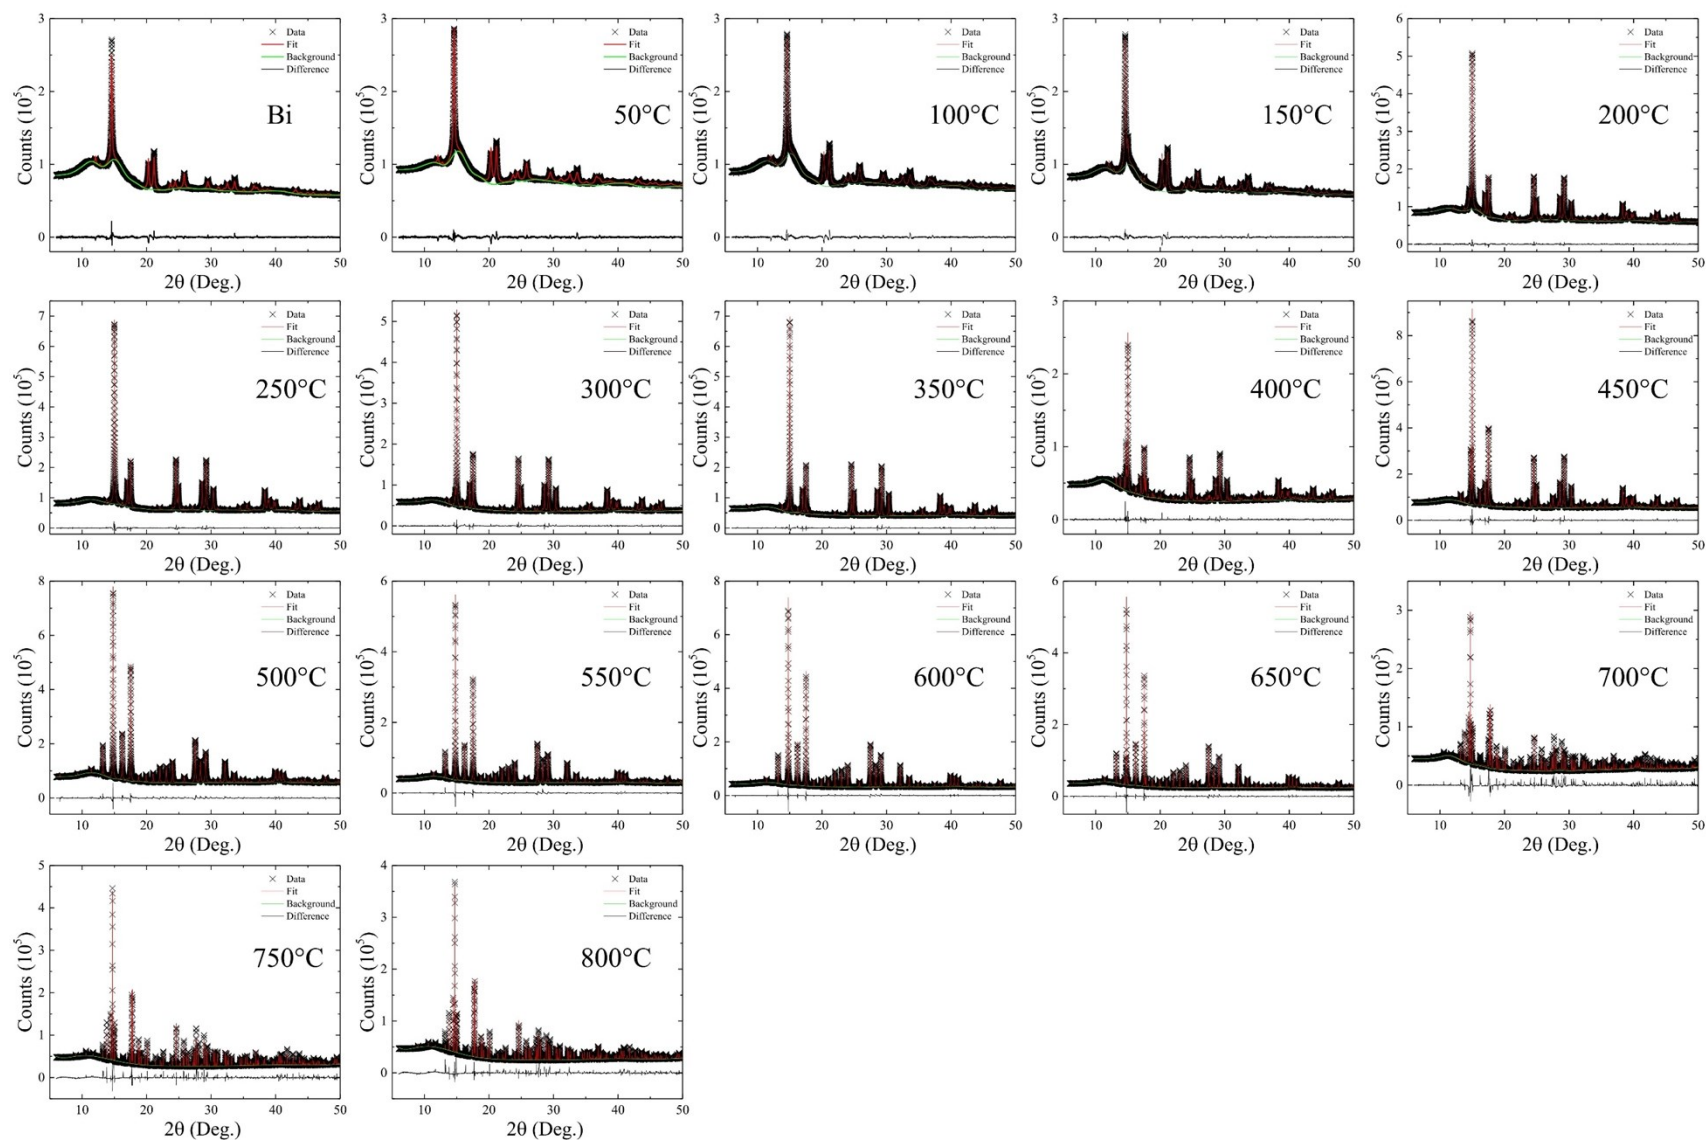

**Fig. S2** Annealing temperature  $T_A$  dependency of fitted values of lattice constants obtained from (a) Bi, (b)  $\beta$ - $\text{Bi}_2\text{O}_3$ , (c)  $\gamma$ - $\text{Bi}_2\text{O}_3$ , and (d)  $\alpha$ - $\text{Bi}_2\text{O}_3$ .

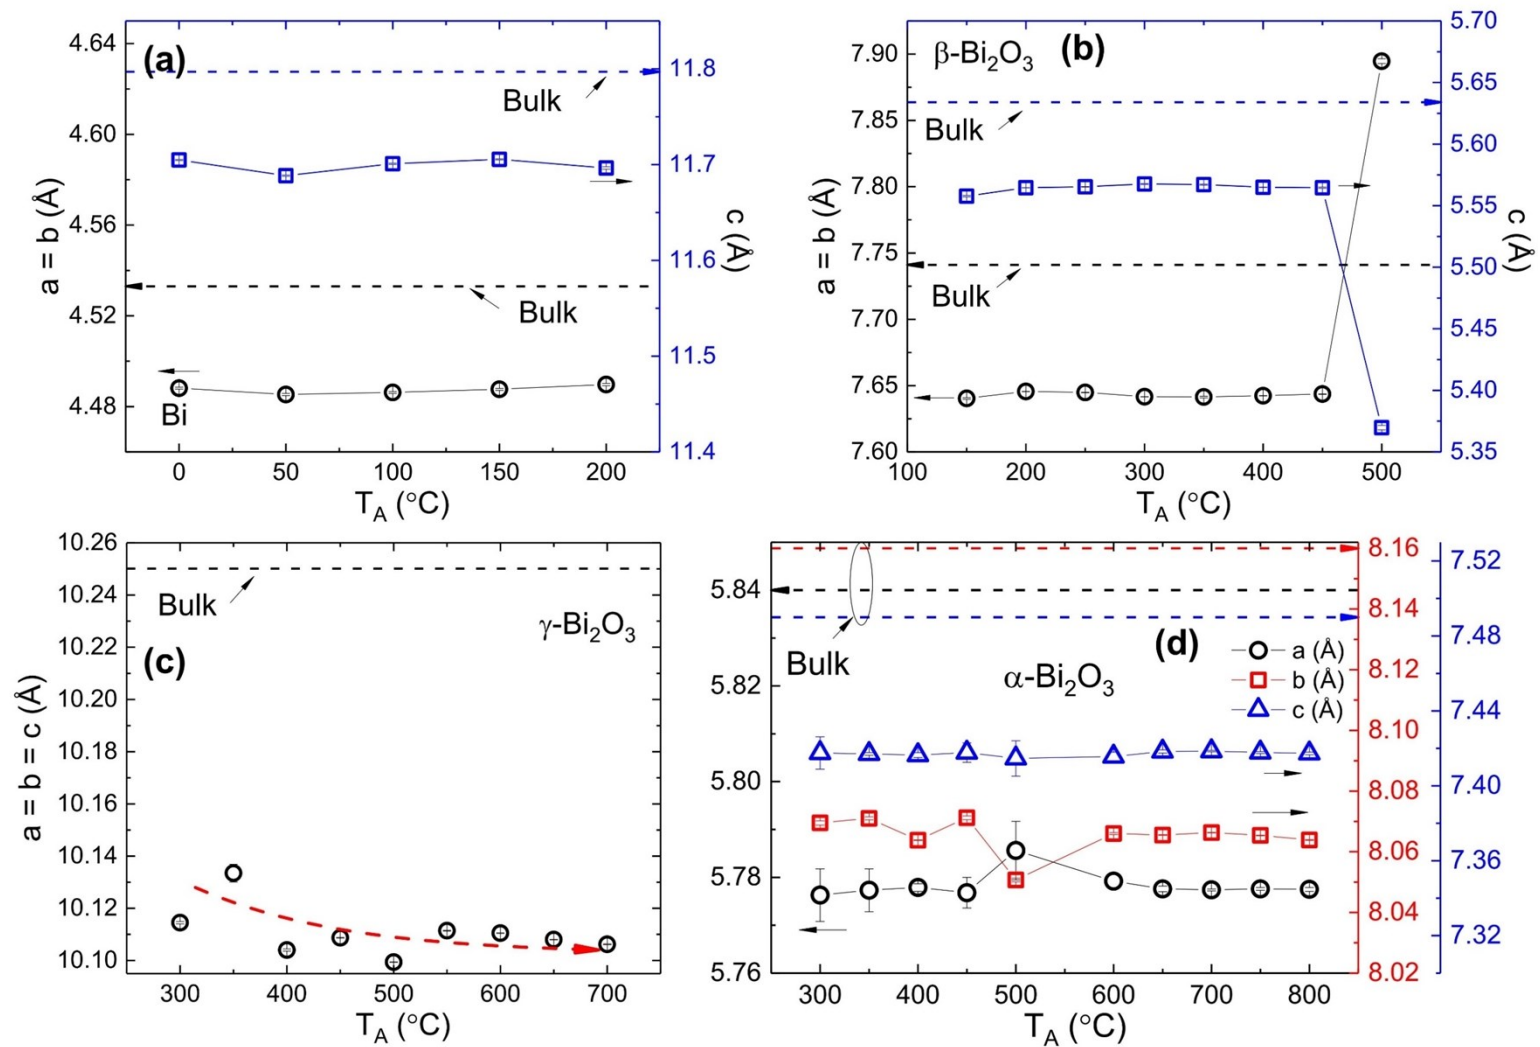

Fig. S3 HRTEM images from  $\beta$ -Bi<sub>2</sub>O<sub>3</sub> NPs.

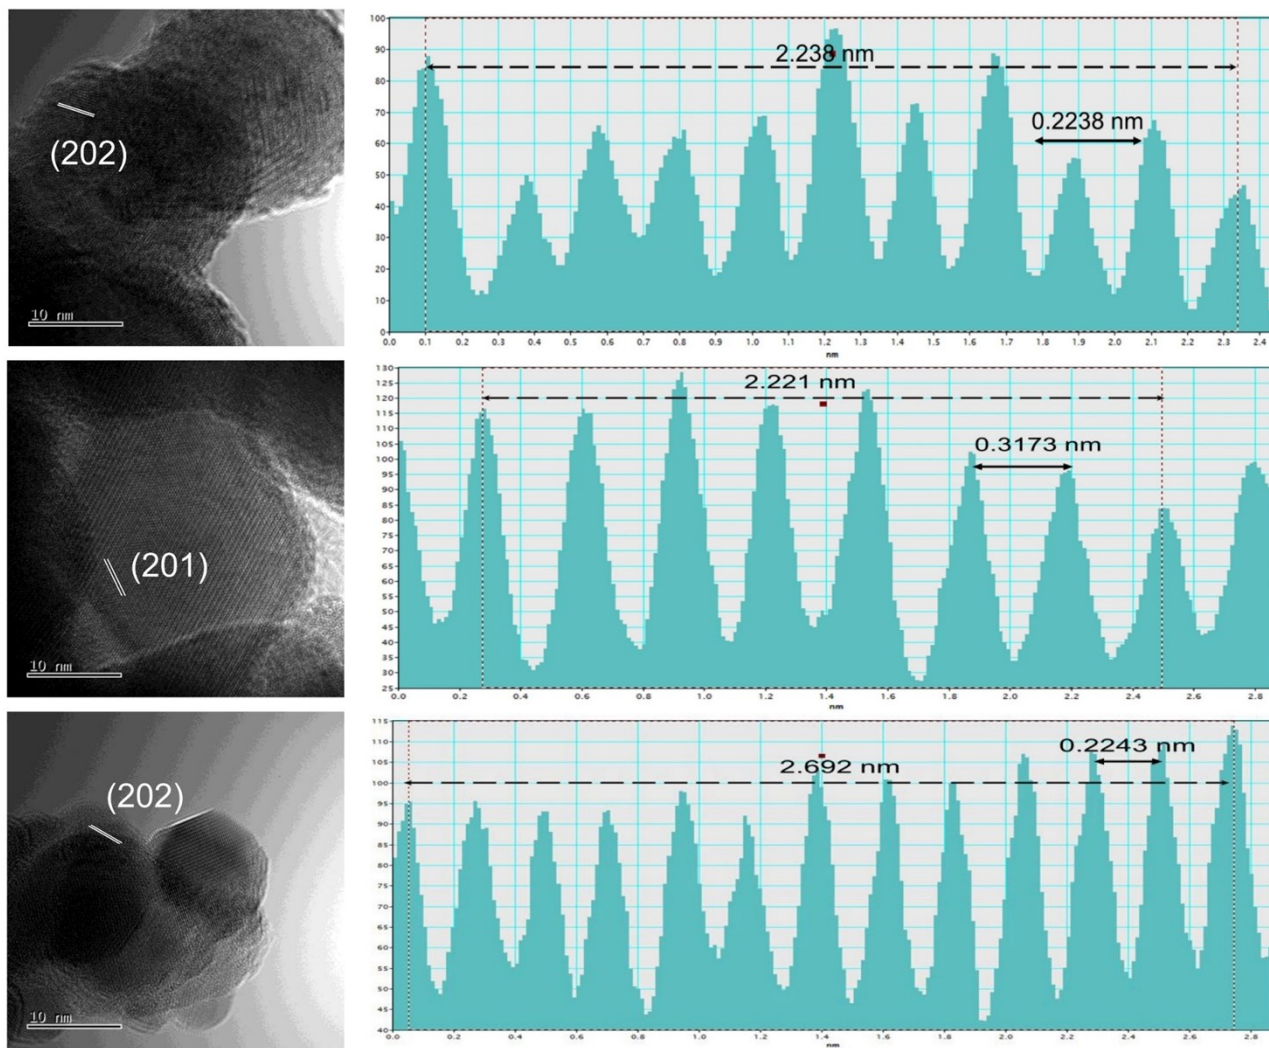

Fig. S4 HRTEM images from  $\gamma$ -Bi<sub>2</sub>O<sub>3</sub> NPs.

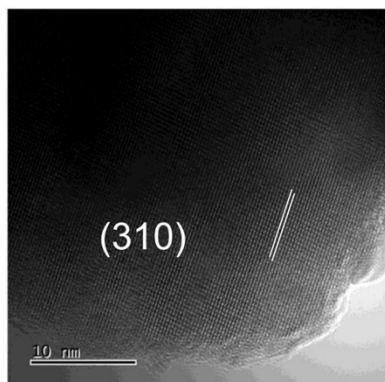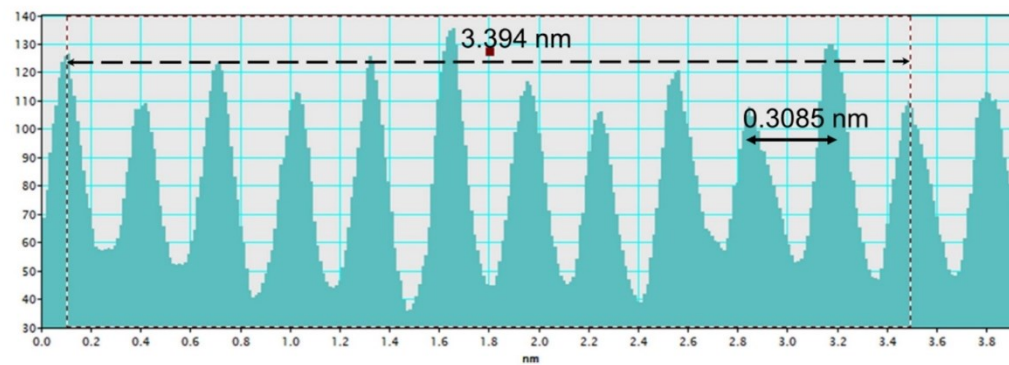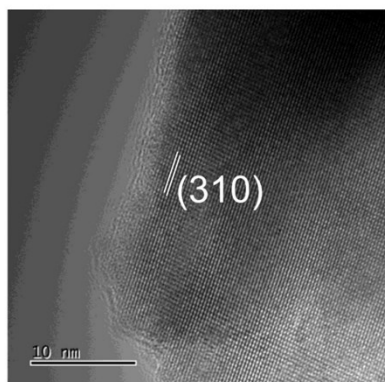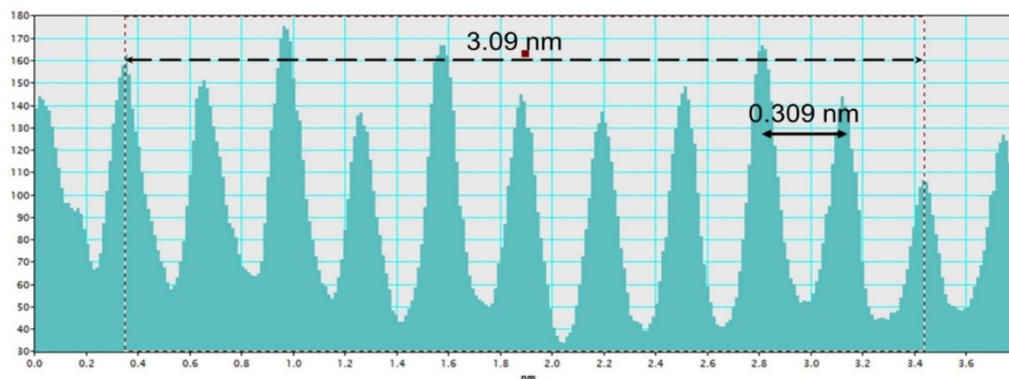



Fig. S5 HRTEM images from  $\alpha$ /R-Bi<sub>2</sub>O<sub>3</sub> particles.

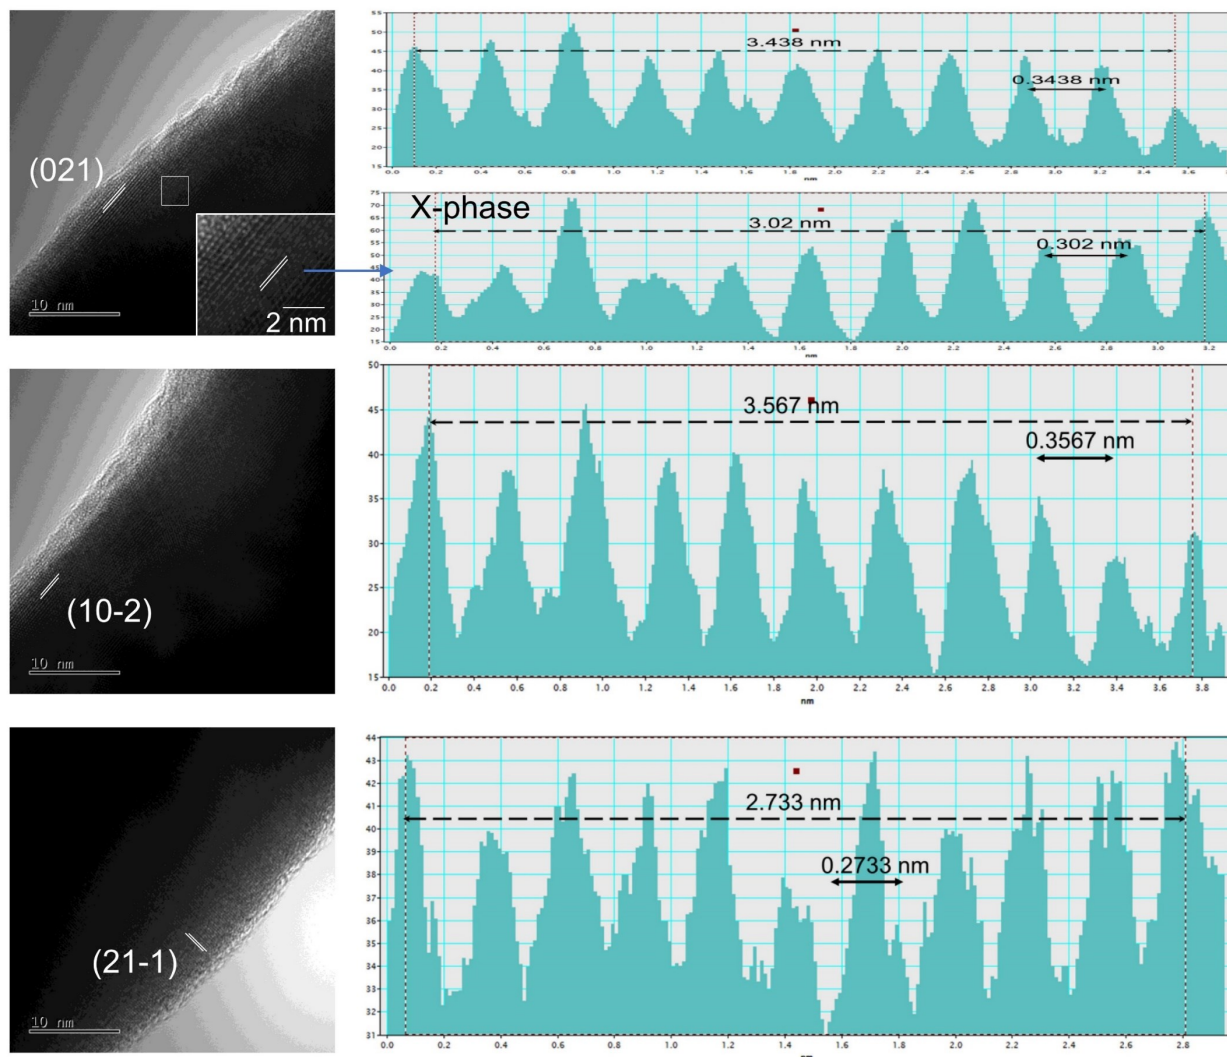

**Fig. S6** Mean diameter distribution histogram obtained from SEM images of Bi and all annealed samples. The red line represents a fit using the Log-normal distribution function.

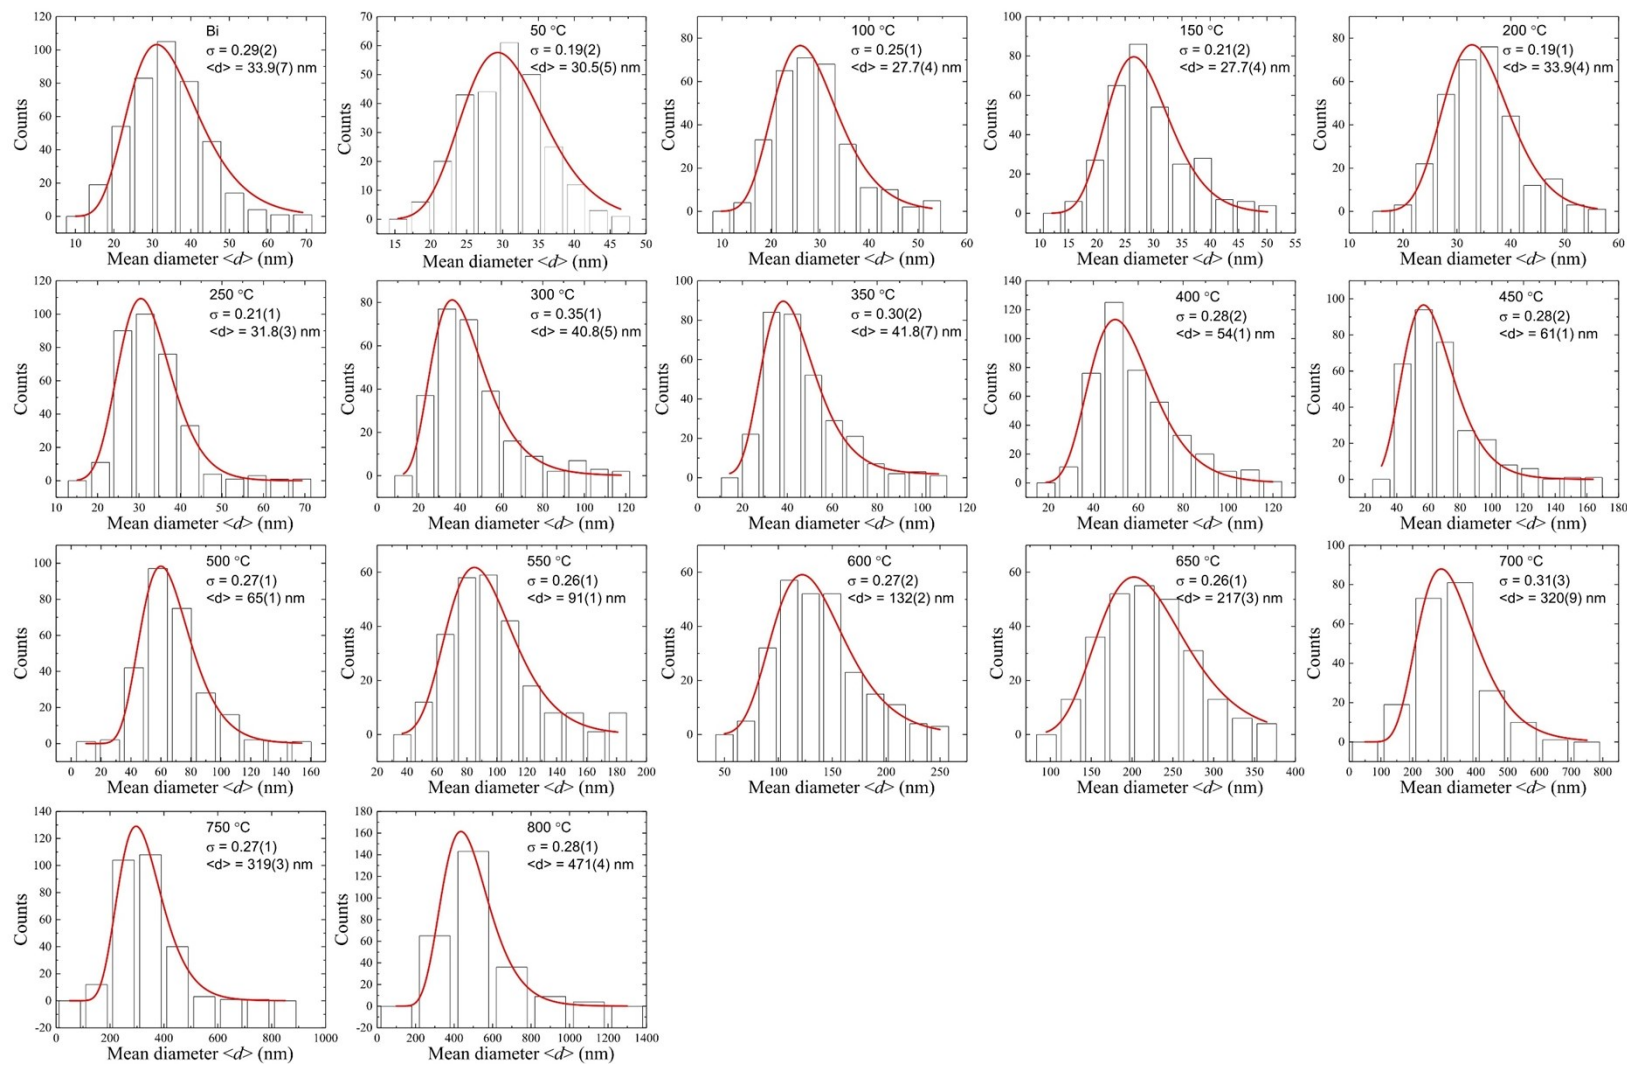

**Fig. S7** (a)-(d) Raman spectra obtained from Bi and all annealed samples.

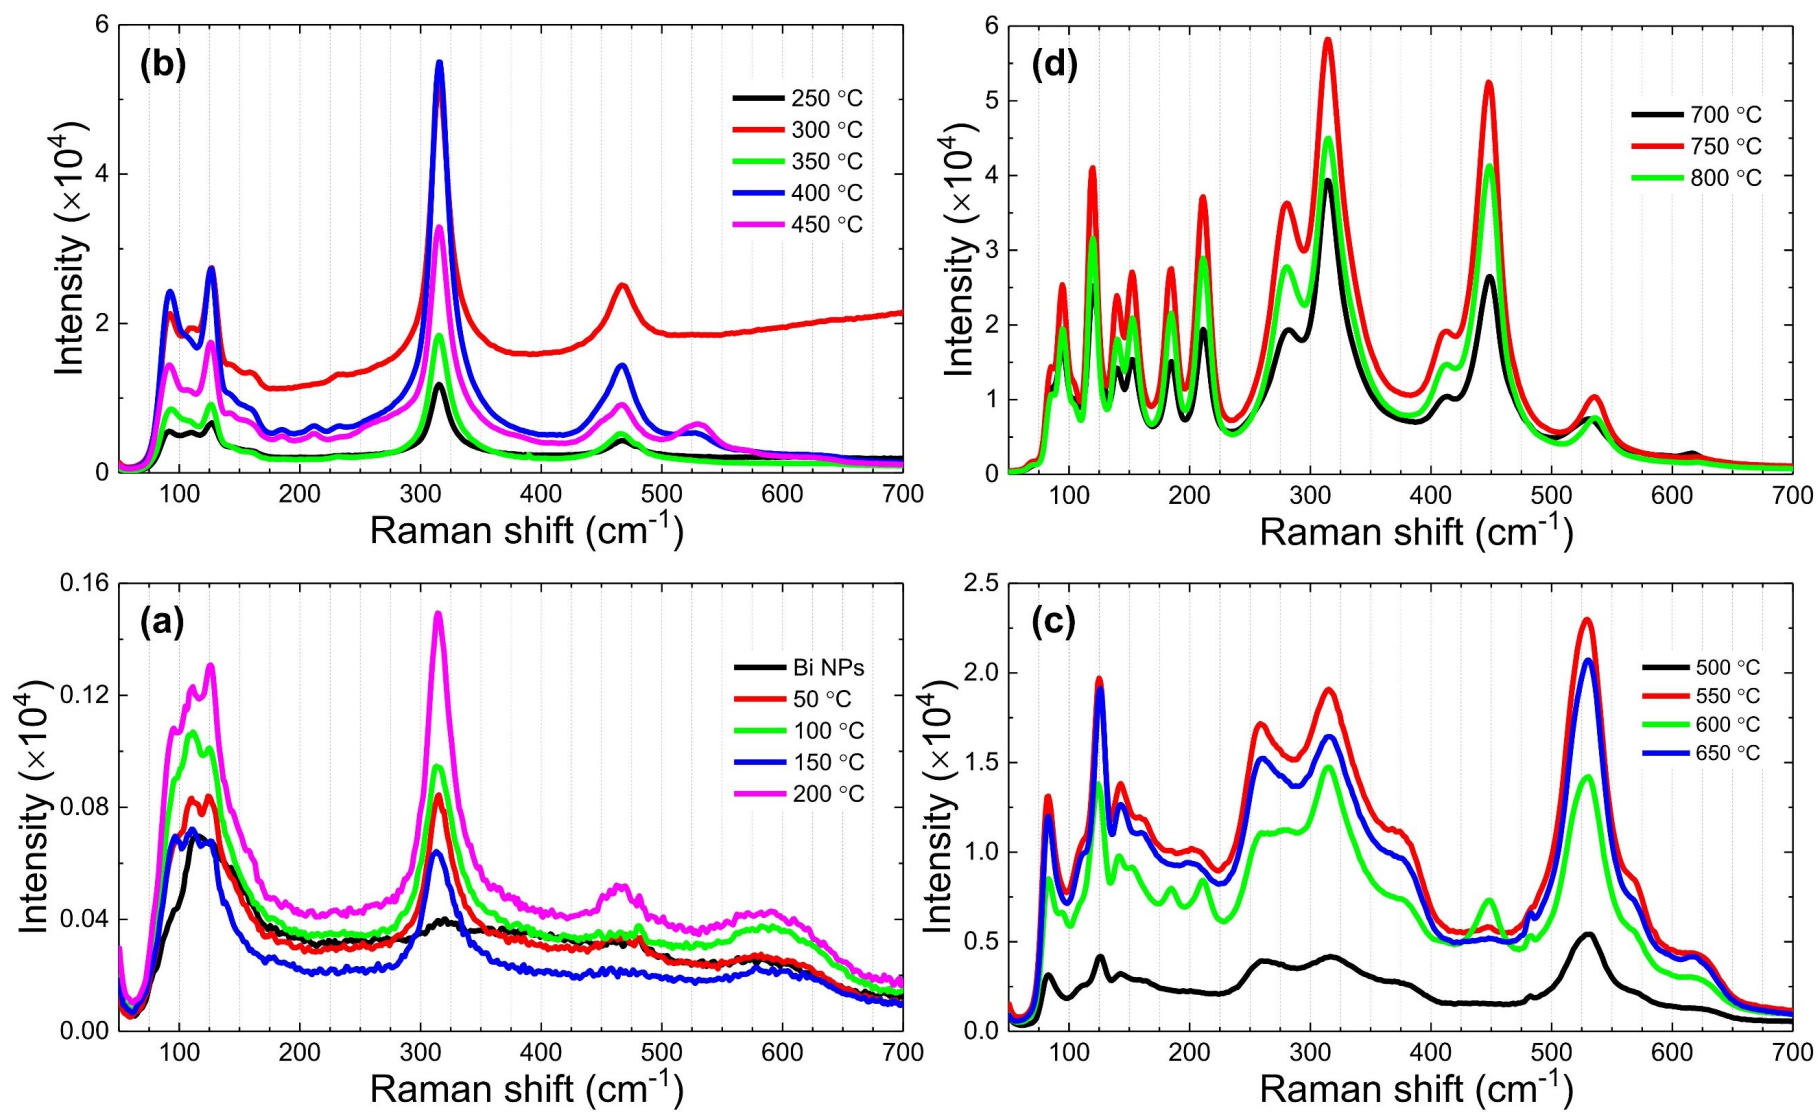



### **Fig. S8 Photodegradation of methylene blue dye solution using $\beta$ -Bi<sub>2</sub>O<sub>3</sub> NPs**

The photodegradation efficiency of  $\beta$ -Bi<sub>2</sub>O<sub>3</sub> NPs ( $T_A = 250\text{ }^\circ\text{C}$ ) was evaluated by photodegradation of the methylene blue (MB) dye aqueous solution. MB degradation was carried out under visible light irradiation by using a 65 W LED bulb. The UV light tubes were placed inside a square box. The 5 ppm MB dye solution with 20 mg of the photocatalyst in a glass beaker was magnetically stirred. The distance between the applied light source and the surface of the MB solution was 15 cm, and the photodegradation study was carried out at room temperature. To ensure the adsorption-desorption equilibrium, the whole suspension was magnetically stirred in the dark for 30 min at room temperature. Then the solution was irradiated with a LED light source. At the regular time interval, 3 ml of aliquots were withdrawn from the suspension and centrifuged immediately to separate the photocatalyst. The photodegradation change in the concentration of MB dye in the solution was analyzed using a UV-vis spectrometer (Spectra Academy, SV2100) by measuring the absorbance in the wavelength range 500–750 nm, while double distilled water is used as a reference (**Figure S5(a)**). The normalized temporal concentration changes ( $C_t/C_0$  where  $C_0$  is the initial concentration of MB and  $C_t$  at the irradiation time  $t$ ) of MB dye recorded during the photocatalytic process are proportional to the normalized integrated area of the absorbance curve, and it can be obtained from the change in the MB dye absorption profile at a given time interval (**Figures S5(b)**).  $\beta$ -Bi<sub>2</sub>O<sub>3</sub> NPs exhibited 19.06 % photodegradation of MB dye after 360 min of LED light irradiation, consistent with the literature.<sup>1</sup>

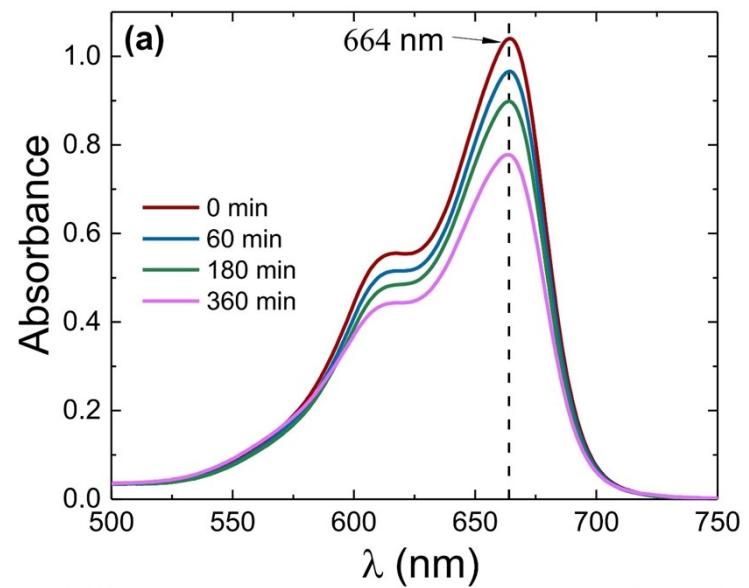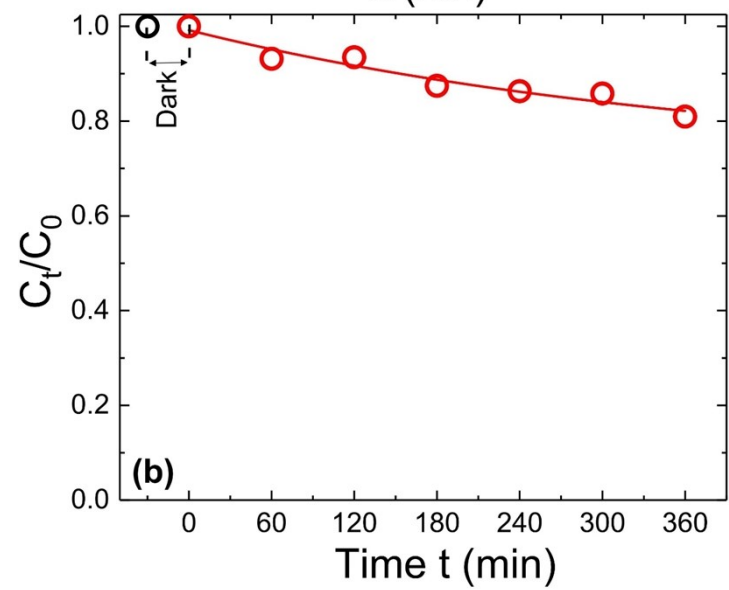

**Fig. S9** Deconvoluted PL spectra obtained from Bi and all annealed samples.

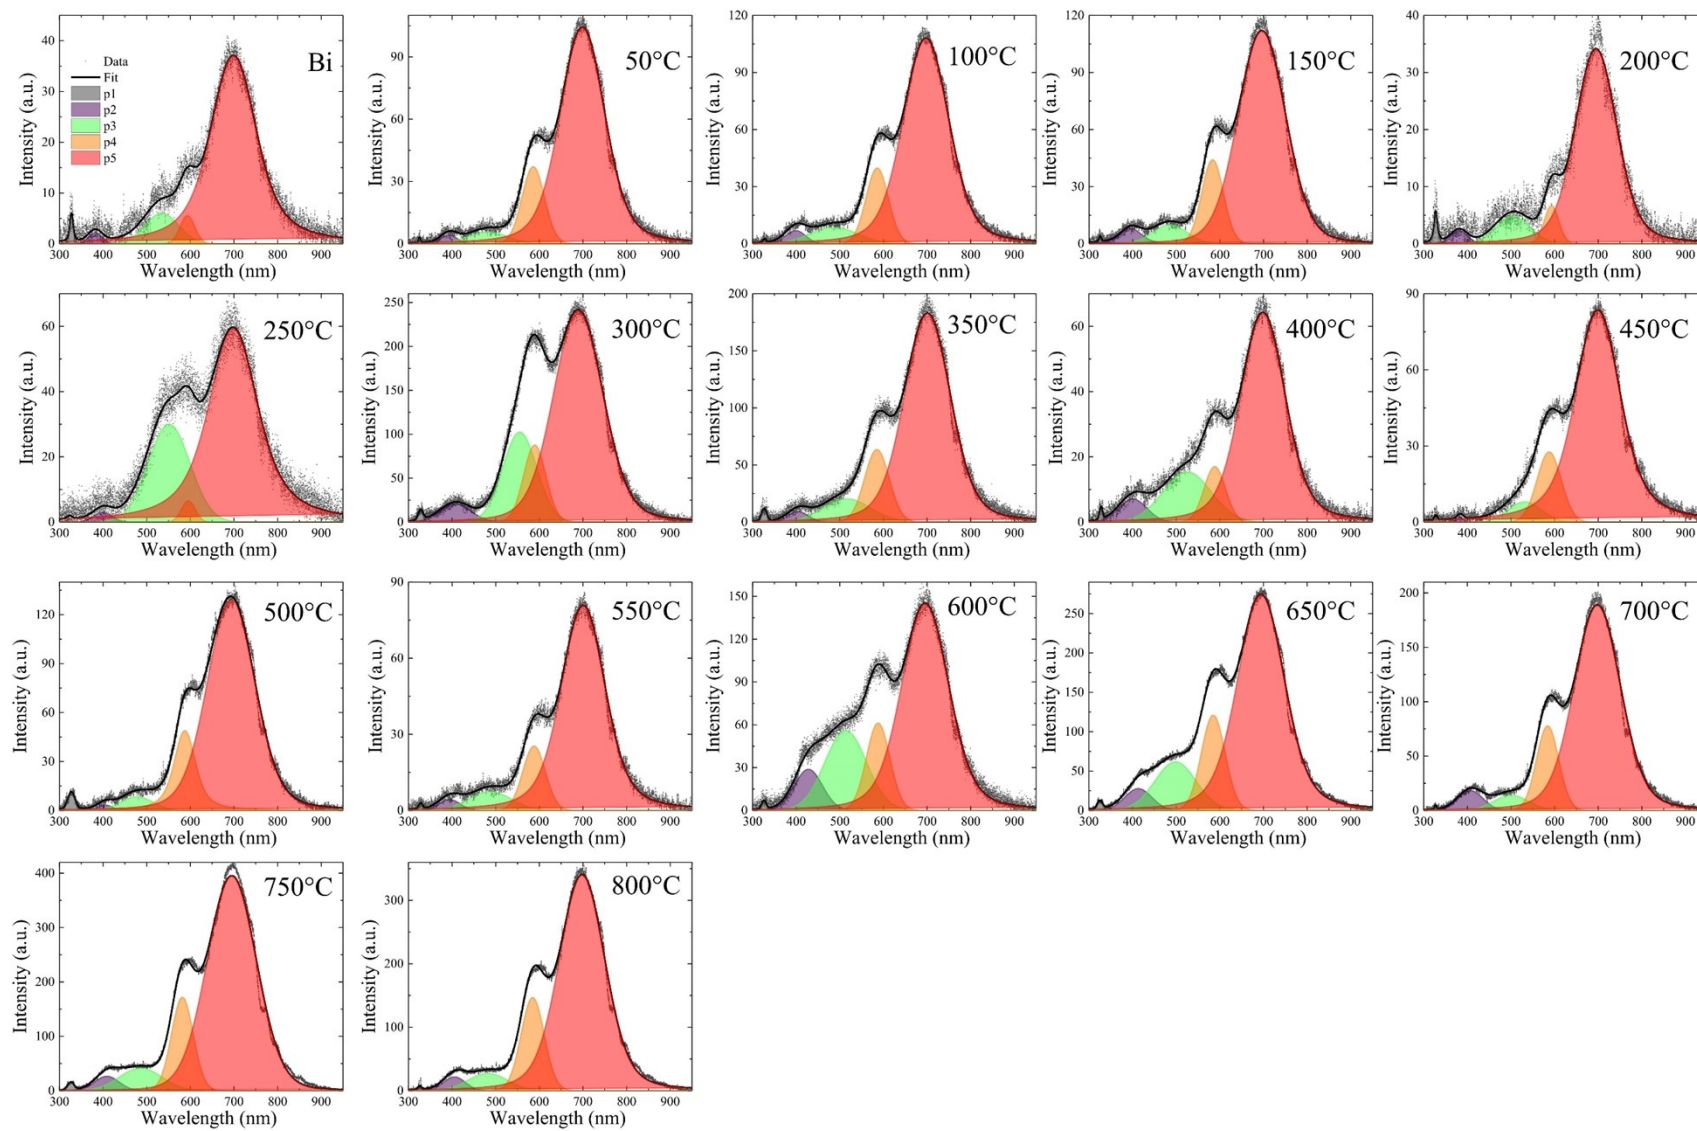

Fig. S10 Plot of annealing temperature  $T_A$  dependency of the integrated area of various peaks obtained from PL spectra.

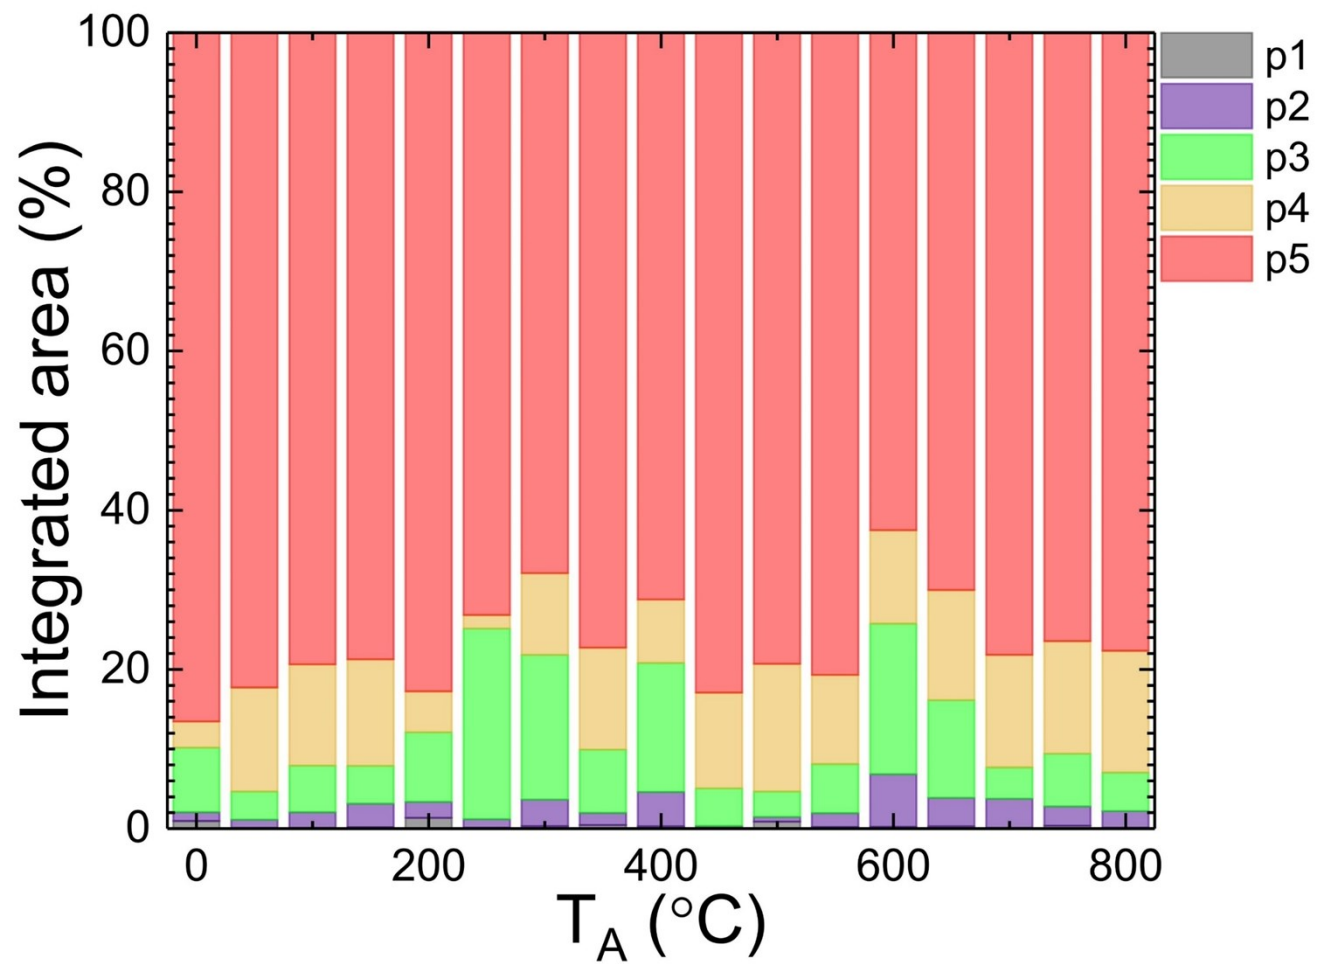



**Fig. S11** Plot of PL emission spectra obtained from pure and the air annealed Bi ingots at various temperatures depicted in the figure.

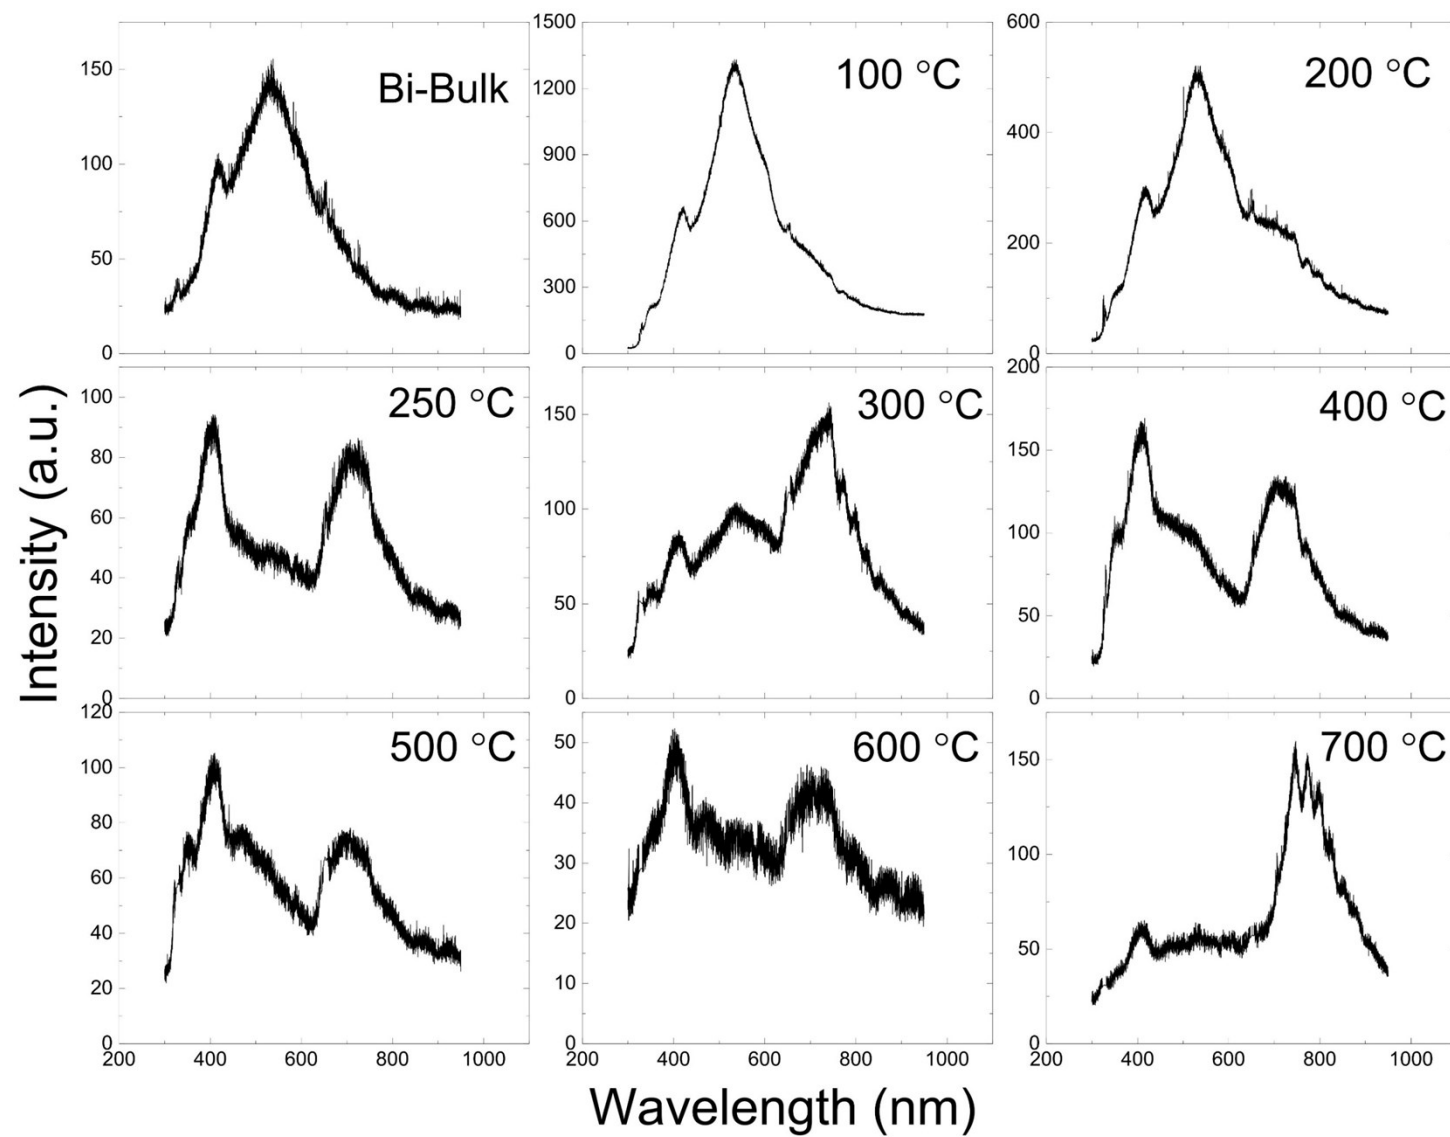

**Fig. S12** Annealing temperature  $T_A$  dependency of (a) CIE (X, Y) coordinates and (b) CCT obtained from PL spectra of the pure and air annealed Bi NPs (solid dots) and ingots (open dots).

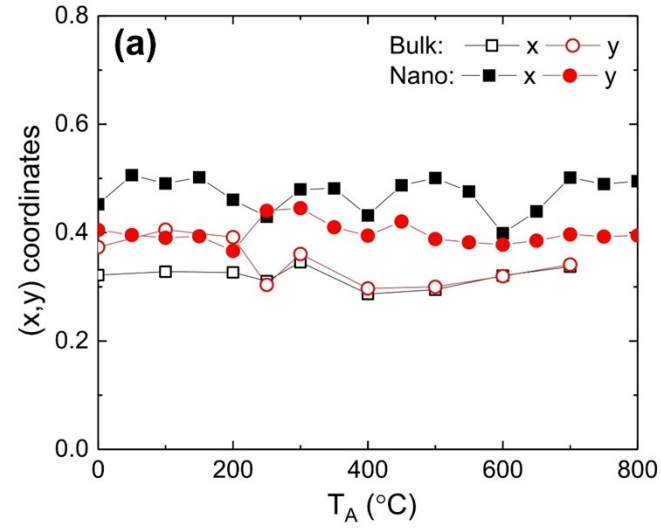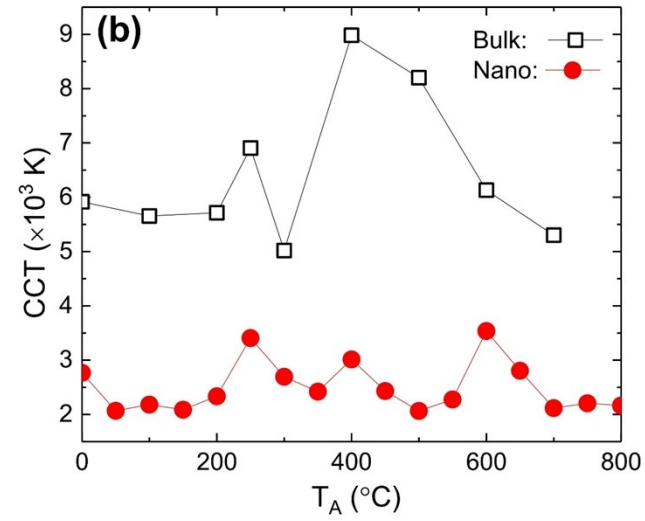

**Fig. S13** (a) Magnetic hysteresis loop measured at 1.8 K from pure and the air annealed Bi NPs. (b) Annealing temperature  $T_A$  dependency of the estimated value of DC magnetic susceptibility ( $\chi$ ) from pure and the air annealed Bi NPs, where the solid red line is guided for eyes.



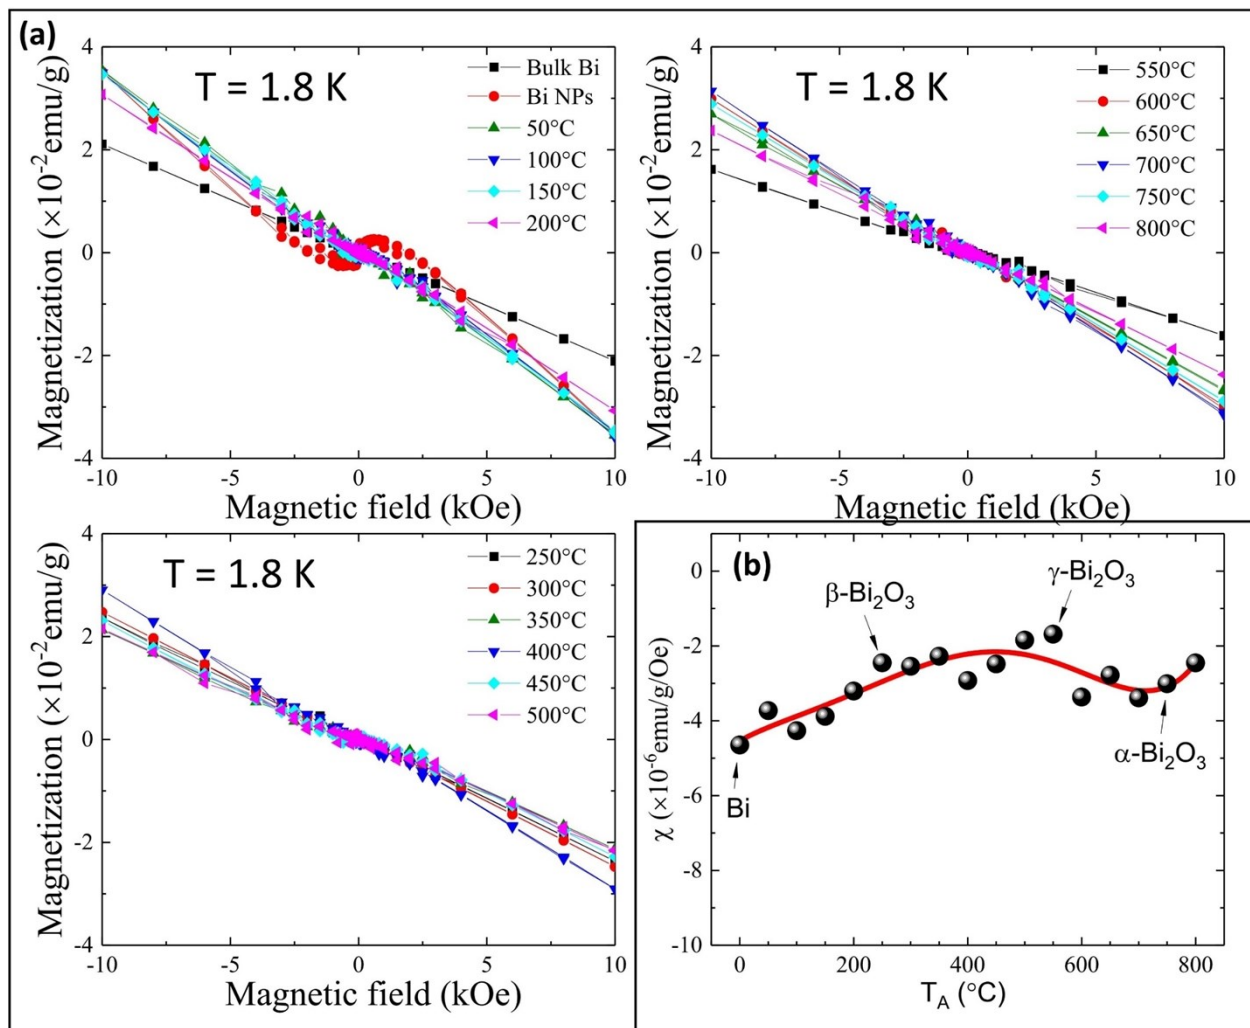

**Table S1** Summary of Rietveld refined fitted parameters for bismuth phase ( $\alpha=\beta=90^\circ$ ,  $\gamma=120^\circ$ ,  $x = y = 0$ , space group  $R\bar{3}m$ , No. 166).

| Parameters          | Bi         | 50 °C      | 100 °C     | 150 °C     | 200 °C      |
|---------------------|------------|------------|------------|------------|-------------|
| a = b (Å)           | 4.4881(4)  | 4.4853(5)  | 4.4862(4)  | 4.4876(4)  | 4.4897(5)   |
| c (Å)               | 11.7048(5) | 11.6884(6) | 11.7009(6) | 11.7055(5) | 11.6965(13) |
| V (Å <sup>3</sup> ) | 204.19(3)  | 203.64(3)  | 203.95(3)  | 204.15(2)  | 204.19(2)   |
| z                   | 0.2327(1)  | 0.2330(1)  | 0.2329(1)  | 0.2330(1)  | 0.2316(2)   |
| wR(%)               | 1.144      | 1.14       | 1.15       | 1.21       | 0.86        |
| GOF(%)              | 3.13       | 3.33       | 3.32       | 3.27       | 2.36        |
| Wt. fraction (%)    | 100        | 100        | 100        | 88.3(2)    | 18.8(1)     |

**Table S2** Summary of Rietveld refined fitted parameters for  $\beta$ -Bi<sub>2</sub>O<sub>3</sub> phase ( $\alpha=\beta=\gamma=90^\circ$ ; O(2): x=0, y=0.5; space group  $P4_21c$ , No.114).

| Parameters          | 150 °C    | 200 °C    | 250 °C    | 300 °C     | 350 °C     | 400 °C    | 450 °C     | 500 °C     |        |
|---------------------|-----------|-----------|-----------|------------|------------|-----------|------------|------------|--------|
| $a = b$ (Å)         | 7.6403(6) | 7.6456(1) | 7.6448(1) | 7.6416(1)  | 7.64143(6) | 7.6424(1) | 7.6436(1)  | 7.8947(18) |        |
| $c$ (Å)             | 5.5577(6) | 5.5645(1) | 5.5653(1) | 5.56764(4) | 5.56709(4) | 5.5649(1) | 5.56456(5) | 5.3697(19) |        |
| V (Å <sup>3</sup> ) | 324.43(5) | 325.27(1) | 325.26(1) | 325.117    | 325.07     | 325.03(1) | 325.11(1)  | 334.68(12) |        |
|                     | x         | 0.0134    | 0.0169    | 0.0166     | 0.0173     | 0.0179    | 0.0182     | 0.0176     | 0.0178 |
| Bi(1)               | y         | 0.2601    | 0.2540    | 0.2550     | 0.2543     | 0.2539    | 0.2552     | 0.2549     | 0.2537 |
|                     | z         | 0.2522    | 0.2403    | 0.2399     | 0.2375     | 0.2378    | 0.2364     | 0.2373     | 0.2376 |
|                     | x         | 0.4510    | 0.3047    | 0.3044     | 0.2914     | 0.2966    | 0.2818     | 0.2896     | 0.2949 |
| O(1)                | y         | 0.3312    | 0.3105    | 0.3103     | 0.3132     | 0.3144    | 0.3148     | 0.3202     | 0.3250 |
|                     | z         | 0.1571    | 0.0295    | 0.0230     | 0.0121     | 0.0220    | 0.0121     | 0.0120     | 0.0287 |
| O(2)                | z         | 0.3879    | 0.3843    | 0.3863     | 0.4036     | 0.41432   | 0.3833     | 0.3960     | 0.4184 |
| wR(%)               | 1.21      | 0.86      | 0.89      | 1.76       | 1.94       | 1.92      | 2.38       | 2.14       |        |
| GOF(%)              | 3.27      | 2.36      | 2.42      | 3.82       | 4.41       | 3.59      | 6.28       | 5.72       |        |
| WF (%)              | 11.7(3)   | 81.2(1)   | 100       | 90.8(3.8)  | 95.4(3.8)  | 66.5(4.2) | 66.4(3.2)  | 1.12(8)    |        |
| Bi(1)               | 0.91(12)  | 0.90(1)   | 0.828(8)  | 0.788(16)  | 0.965(19)  | 0.824(26) | 0.905(22)  | 1          |        |
| O(1)                | 1         | 1         | 1         | 1          | 1          | 1         | 1          | 1          |        |
| O(2)                | 1         | 1         | 0.95(2)   | 0.829(32)  | 0.939(33)  | 0.713(46) | 0.822(45)  | 1          |        |

**Table S3** Summary of Rietveld refined fitted parameters for  $\gamma$ -Bi<sub>2</sub>O<sub>3</sub> phase ( $\alpha=\beta=\gamma=90^\circ$ ; Bi(2):  $x=y=z=0$ ; O(2) and O(3):  $x=y=z$ ; space group *I23*, No. 197).

| Parameters          | 300 °C     | 350 °C      | 400 °C      | 450 °C     | 500 °C     | 550 °C     | 600 °C     | 650 °C     | 700 °C     |
|---------------------|------------|-------------|-------------|------------|------------|------------|------------|------------|------------|
| $a = b$ (Å)         | 10.1145(4) | 10.1335(34) | 10.1040(4)  | 10.1087(1) | 10.0994(1) | 10.1114(1) | 10.1105(1) | 10.1080(1) | 10.1062(2) |
| V (Å <sup>3</sup> ) | 1034.8(1)  | 1041(1)     | 1031.53(11) | 1032.98(4) | 1030.11(3) | 1033.82(3) | 1033.51(2) | 1032.75(2) | 1032.2(1)  |
| Bi(1)               | x          | 0.8287      | 0.8244      | 0.8308     | 0.8262     | 0.8247     | 0.8244     | 0.8232     | 0.8259     |
|                     | y          | 0.6868      | 0.6801      | 0.6854     | 0.6817     | 0.6818     | 0.6801     | 0.6803     | 0.6828     |
|                     | z          | 0.9822      | 0.9881      | 0.9865     | 0.9877     | 0.9868     | 0.9881     | 0.9880     | 0.9875     |
| O(1)                | x          | 0.8112      | 0.8690      | 0.8170     | 0.8434     | 0.8538     | 0.8690     | 0.8682     | 0.8362     |
|                     | y          | 0.7655      | 0.7661      | 0.7736     | 0.7420     | 0.7487     | 0.7661     | 0.7537     | 0.7116     |
|                     | z          | 0.5217      | 0.4884      | 0.4810     | 0.5143     | 0.4856     | 0.4884     | 0.4836     | 0.5431     |
| O(2)                | x          | 0.8182      | 0.8093      | 0.8422     | 0.8311     | 0.8057     | 0.8093     | 0.8097     | 0.8292     |
| O(3)                | x          | 0.1284      | 0.1624      | 0.1453     | 0.2019     | 0.1426     | 0.162      | 0.1487     | 0.1951     |
| wR(%)               | 1.76       | 1.94        | 1.92        | 2.38       | 2.14       | 2.460      | 2.63       | 2.65       | 4.35       |
| GOF(%)              | 3.82       | 4.41        | 3.59        | 6.27       | 5.72       | 4.71       | 5.26       | 4.64       | 7.98       |
| Wt. fraction (%)    | 7.1(1.3)   | 0.5(0.1)    | 14.6(5.0)   | 32.6(3.9)  | 98.3(0.1)  | 100        | 99.5(6.0)  | 92.2(1)    | 21*        |
| Bi(1)               | 0.98(9)    | 1           | 0.995(171)  | 0.872(53)  | 0.927(29)  | 0.9989(4)  | 0.975(29)  | 0.941      | 1          |
| Bi(2)               | 0.819(104) | 1           | 0.774(146)  | 0.825(43)  | 0.741(20)  | 0.943(8)   | 0.837(33)  | 0.733(5)   | 1          |
| O(1)                | 1          | 1           | 1           | 1          | 1          | 1.0104(17) | 0.993(33)  | 0.998(13)  | 1          |
| O(2)                | 1          | 1           | 0.841(202)  | 0.676(86)  | 0.668(35)  | 0.861(29)  | 0.965(38)  | 0.761(19)  | 1          |
| O(3)                | 1          | 1           | 1           | 1          | 0.766(42)  | 1.08(4)    | 1          | 1          | 1          |



**Table S4** Summary of Rietveld refined fitted parameters for  $\alpha$ -Bi<sub>2</sub>O<sub>3</sub> phase ( $\alpha=\beta=90^\circ$ , space group  $P2_1/c$ , No. 14).

| Parameters          | 300 °C     | 350 °C     | 400 °C     | 450 °C     | 500 °C     | 600 °C     | 650 °C     | 700 °C     | 750 °C     | 800 °C     |
|---------------------|------------|------------|------------|------------|------------|------------|------------|------------|------------|------------|
| <i>a</i> (Å)        | 5.7763(55) | 5.7773(45) | 5.7779(8)  | 5.7768(32) | 5.7856(61) | 5.7792(15) | 5.7776(6)  | 5.7774(2)  | 5.7776(3)  | 5.7775(4)  |
| <i>b</i> (Å)        | 8.0695(7)  | 8.0710(5)  | 8.0638(1)  | 8.0712(6)  | 8.0507(6)  | 8.0660(3)  | 8.0655(1)  | 8.0663(1)  | 8.0654(1)  | 8.0639(1)  |
| <i>c</i> (Å)        | 7.4175(86) | 7.4170(7)  | 7.4164(13) | 7.4177(52) | 7.4146(94) | 7.4156(24) | 7.4183(9)  | 7.4185(4)  | 7.4178(5)  | 7.4173(7)  |
| $\beta$ (deg.)      | 112.98(2)  | 112.92(1)  | 112.981(3) | 113.01(1)  | 112.96(2)  | 112.995(5) | 112.982(2) | 112.977(1) | 112.978(1) | 112.977(1) |
| V (Å <sup>3</sup> ) | 318.31(4)  | 318.39(3)  | 318.12(1)  | 318.33(4)  | 318.00(3)  | 318.21(2)  | 318.25(1)  | 318.29(1)  | 318.24(1)  | 318.15(1)  |
|                     | x          | 0.5230     | 0.5267     | 0.5283     | 0.5283     | 0.5283     | 0.5283     | 0.5283     | 0.5241     | 0.5223     |
| Bi(1)               | y          | 0.1842     | 0.1893     | 0.1847     | 0.1847     | 0.1847     | 0.1847     | 0.1847     | 0.1832     | 0.1846     |
|                     | z          | 0.3580     | 0.3686     | 0.3656     | 0.3656     | 0.3656     | 0.3656     | 0.3656     | 0.3624     | 0.3579     |
|                     | x          | 0.0395     | 0.0223     | 0.0352     | 0.0352     | 0.0352     | 0.0352     | 0.0352     | 0.0400     | 0.0393     |
| Bi(2)               | y          | 0.0424     | 0.0336     | 0.0423     | 0.0423     | 0.0423     | 0.0423     | 0.0423     | 0.0419     | 0.0428     |
|                     | z          | 0.7755     | 0.7784     | 0.7739     | 0.7739     | 0.7739     | 0.7739     | 0.7739     | 0.7753     | 0.7755     |
|                     | x          | 0.7855     | 0.6927     | 0.7624     | 0.7624     | 0.7624     | 0.7624     | 0.7624     | 0.7824     | 0.6927     |
| O(1)                | y          | 0.3225     | 0.4299     | 0.3094     | 0.3094     | 0.3094     | 0.3094     | 0.3094     | 0.3136     | 0.4299     |
|                     | z          | 0.7025     | 0.5839     | 0.7044     | 0.7044     | 0.7044     | 0.7044     | 0.7044     | 0.7206     | 0.5839     |
|                     | x          | 0.2895     | 0.3106     | 0.2895     | 0.2895     | 0.2895     | 0.2895     | 0.2895     | 0.2438     | 0.3106     |
| O(2)                | y          | 0.0346     | 0.0688     | 0.0346     | 0.0346     | 0.0346     | 0.0346     | 0.0346     | 0.0347     | 0.0688     |
|                     | z          | 0.1292     | 0.2031     | 0.1292     | 0.1292     | 0.1292     | 0.1292     | 0.1292     | 0.1345     | 0.2031     |
|                     | x          | 0.2993     | 0.2712     | 0.2993     | 0.2993     | 0.2993     | 0.2993     | 0.2993     | 0.2648     | 0.2712     |
| O(3)                | y          | 0.0629     | 0.0633     | 0.0629     | 0.0629     | 0.0629     | 0.0629     | 0.0629     | 0.0461     | 0.0633     |
|                     | z          | 0.5004     | 0.5282     | 0.5089     | 0.5089     | 0.5089     | 0.5089     | 0.5089     | 0.4815     | 0.5282     |

|                        |        |          |           |        |         |         |        |           |           |           |
|------------------------|--------|----------|-----------|--------|---------|---------|--------|-----------|-----------|-----------|
| wR(%)                  | 1.76   | 1.94     | 1.92      | 2.38   | 2.14    | 2.63    | 2.65   | 4.35      | 7.31      | 6.73      |
| GOF(%)                 | 3.82   | 4.41     | 3.59      | 6.27   | 5.72    | 5.26    | 4.64   | 7.98      | 13.89     | 12.36     |
| Wt.<br>fraction<br>(%) | 2.1(1) | 4.5(1)   | 18.9(2.2) | 0.8(3) | 0.60(5) | 0.45(4) | 7.8(1) | 70*       | 76*       | 75*       |
| Bi(1)                  | 1      | 1        | 0.858(49) | 1      | 1       | 1       | 1      | 0.698(21) | 1         | 0.821(47) |
| Bi(2)                  | 1      | 0.931(6) | 0.818(46) | 1      | 1       | 1       | 1      | 0.681(21) | 1         | 0.808(46) |
| O(1)                   | 1      | 1        | 1         | 1      | 1       | 1       | 1      | 0.771(36) | 0.592(36) | 0.668(82) |
| O(2)                   | 1      | 1        | 1         | 1      | 1       | 1       | 1      | 0.792(31) | 1         | 1         |
| O(3)                   | 1      | 1        | 1         | 1      | 1       | 1       | 1      | 1         | 1         | 1         |

**Table S5** List of 2 $\theta$  values obtained from x-Bi<sub>2</sub>O<sub>3</sub> is compared with reported  $\delta$ -Bi<sub>2</sub>O<sub>3</sub> ( $a = 5.4984$  Å; Space group:  $Fm\bar{3}m$  (No. 225); Lattice sites: Bi(0,0,0), O1(1/4,1/4,1/4), O2(0.324,x,x)).<sup>2</sup>

| x-Bi <sub>2</sub> O <sub>3</sub> |                   |     |                   | $\delta$ -Bi <sub>2</sub> O <sub>3</sub> |                   |       |
|----------------------------------|-------------------|-----|-------------------|------------------------------------------|-------------------|-------|
| No.                              | 2 $\theta$ (deg.) | No. | 2 $\theta$ (deg.) | No.                                      | 2 $\theta$ (deg.) | I     |
| 1                                | 9.39              | 15  | 26.89             | 1                                        | 14.96             | 100   |
| 2                                | 11.531            | 16  | 27.78             | 2                                        | 17.29             | 8.99  |
| 3                                | 13.334            | 17  | 28.605            | 3                                        | 24.55             | 85.29 |
| 4                                | 14.926*           | 18  | 29.052            | 4                                        | 28.87             | 66.25 |
| 5                                | 16.17             | 19  | 29.41             | 5                                        | 30.18             | 8.32  |
| 6                                | 16.368            | 20  | 31.66             | 6                                        | 34.99             | 6.63  |
| 7                                | 17.484            | 21  | 32.04             | 7                                        | 38.25             | 12.24 |
| 8                                | 21.202            | 22  | 32.438            | 8                                        | 39.28             | 16.51 |
| 9                                | 22.253            | 23  | 33.444            | 9                                        | 43.21             | 13.95 |
| 10                               | 22.983            | 24  | 33.861            | 10                                       | 45.98             | 8.26  |
| 11                               | 23.259            | 25  | 40.321            | 11                                       | 50.33             | 4.16  |
| 12                               | 23.932            | 26  | 41.509            | 12                                       | 52.81             | 13.23 |
| 13                               | 24.226            | 27  | 48.14             | 13                                       |                   |       |
| 14                               | 26.058            |     |                   | 14                                       |                   |       |

\*Most intense peak

**Table S6** Summary of estimated grain size from the most intense PXRD peak and the fitted parameters to the histogram obtained from SEM images of Bi and the air annealed samples.

| T <sub>A</sub> (°C) | Grain size (nm) |                                  |                                  |                                  |                                  | SEM      |           |
|---------------------|-----------------|----------------------------------|----------------------------------|----------------------------------|----------------------------------|----------|-----------|
|                     | Bi              | β-Bi <sub>2</sub> O <sub>3</sub> | γ-Bi <sub>2</sub> O <sub>3</sub> | α-Bi <sub>2</sub> O <sub>3</sub> | x-Bi <sub>2</sub> O <sub>3</sub> | <d> (nm) | σ         |
| 0                   | 28              | .....                            | .....                            | .....                            | .....                            | 34.0(1)  | 0.30(4)   |
| 50                  | 20              | .....                            | .....                            | .....                            | .....                            | 30.6(8)  | 0.21(4)   |
| 100                 | 20              | .....                            | .....                            | .....                            | .....                            | 27.6(5)  | 0.25(3)   |
| 150                 | 23              | 32                               | .....                            | .....                            | .....                            | 27.4(4)  | 0.18(2)   |
| 200                 | 6               | 46                               | .....                            | .....                            | .....                            | 33.9(5)  | 0.18(2)   |
| 250                 | .....           | 39                               | .....                            | .....                            | .....                            | 31.8(4)  | 0.21(2)   |
| 300                 | .....           | 62                               | 59                               | 125                              | .....                            | 40.5(6)  | 0.33(2)   |
| 350                 | .....           | 62                               | 61                               | 115                              | .....                            | 41.7(7)  | 0.30(2)   |
| 400                 | .....           | 65                               | 81                               | 252                              | .....                            | 52.9(1)  | 0.25(3)   |
| 450                 | .....           | 72                               | 72                               | 136                              | .....                            | 61.1(1)  | 0.278(2)  |
| 500                 | .....           | 52                               | 67                               | 162                              | .....                            | 64.5(6)  | 0.269(9)  |
| 550                 | .....           | .....                            | 90                               | 159                              | .....                            | 90(1)    | 0.25(2)   |
| 600                 | .....           | .....                            | 105                              | 192                              | .....                            | 131(3)   | 0.27(3)   |
| 650                 | .....           | .....                            | 125                              | 227                              | .....                            | 219.5(5) | 0.29(4)   |
| 700                 | .....           | .....                            | 93                               | 207                              | 53                               | 319(8)   | 0.303(34) |
| 750                 | .....           | .....                            | .....                            | 234                              | 86                               | 319(3)   | 0.27(1)   |
| 800                 | .....           | .....                            | .....                            | 221                              | 104                              | 470(3)   | 0.275(5)  |

**Table S7** Summary of fitted values of Raman scattering frequencies obtained from Bi and the air annealed samples.

| No. | Bi   | 50°C | 100°C | 150°C | 200°C | 250°C | 300°C | 350°C | 400°C | 450°C | 500°C | 550°C | 600°C | 650°C | 700°C | 750°C | 800°C |
|-----|------|------|-------|-------|-------|-------|-------|-------|-------|-------|-------|-------|-------|-------|-------|-------|-------|
| 1   | 90   | 96   | 97    | 97    | 94    | 90    | 90    | 93    | 91    | 90    | 81    | 81    | 82    | 82    | ..... | 54    | ..... |
| 2   | 111  | 111  | 110   | 111   | 110   | 109   | 109   | 110   | 108   | 103   | 88    | 89    | 93    | 89    | 58    | 57    | ..... |
| 3   | 114  | 125  | 123   | 123   | 125   | 127   | 127   | 127   | 127   | 114   | 111   | 111   | 109   | 111   | 68    | 68    | 69    |
| 4   | 138  | 136  | 145   | 140   | 143   | 142   | 142   | 141   | 142   | 127   | 126   | 125   | 124   | 126   | 85    | 84    | 85    |
| 5   | 188  | 182  | 178   | 178   | 184   | 161   | 161   | 155   | 159   | 142   | 141   | 141   | 140   | 142   | 95    | 94    | 95    |
| 6   | 317  | 315  | 315   | 314   | 315   | 234   | 232   | 232   | 185   | 157   | 153   | 157   | 151   | 159   | 104   | 104   | 104   |
| 7   | 329  | 324  | 334   | 328   | 329   | 267   | 246   | 262   | 207   | 186   | 198   | 206   | 185   | 186   | 121   | 120   | 120   |
| 8   | 473  | 465  | 463   | 466   | 466   | 316   | 274   | 315   | 212   | 205   | 255   | 257   | 211   | 205   | 140   | 140   | 140   |
| 9   | 481  | 482  | 482   | ..... | 482   | 322   | 316   | 320   | 232   | 212   | 272   | 281   | 258   | 257   | 153   | 153   | 153   |
| 10  | 584  | 574  | 586   | 583   | 573   | 468   | 319   | 465   | 270   | 270   | 317   | 312   | 281   | 280   | 185   | 185   | 185   |
| 11  | 619* | 612* | 627*  | 623*  | 611*  | 472   | 467   | 467   | 316   | 316   | 359   | 344   | 313   | 313   | 211   | 211   | 211   |
| 12  |      |      |       |       |       | 591   | 502   | 482   | 320   | 320   | 382   | 381   | 334   | 338   | 254*  | 255*  | 254*  |
| 13  |      |      |       |       |       | 628*  |       | 505   | 450   | 450   | 438   | 436   | 380   | 380   | 282   | 281   | 281   |
| 14  |      |      |       |       |       |       |       | 606   | 467   | 468   | 482*  | 448   | 434   | 434   | 314   | 314   | 314   |
| 15  |      |      |       |       |       |       |       | 638*  | 471*  | 475*  | 516   | 481*  | 448   | 448   | 330   | 333   | 334   |
| 16  |      |      |       |       |       |       |       |       | 526   | 529   | 530   | 494   | 482*  | 482*  | 412   | 412   | 412   |
| 17  |      |      |       |       |       |       |       |       | 571*  | 569*  | 566*  | 528   | 518   | 500   | 436   | 434   | 438   |
| 18  |      |      |       |       |       |       |       |       | 616   | 606   | 621   | 567*  | 530   | 529   | 449   | 448   | 449   |
| 19  |      |      |       |       |       |       |       |       | 637   | 630   | 633   | 614   | 566*  | 567*  | 464   | 461   | 465   |
| 20  |      |      |       |       |       |       |       |       |       |       |       | 628   | 617   | 619   | 531   | 536   | 536   |
| 21  |      |      |       |       |       |       |       |       |       |       |       |       | 630   | 632   | 617*  | 622*  | 623*  |

\*Not assigned to any reported vibration mode.

**Table S8** Summary of fitted values of FWHM of various phonon modes obtained from Bi and the air annealed samples.

| No. | Bi  | 50°C | 100°C | 150°C | 200°C | 250°C | 300°C | 350°C | 400°C | 450°C | 500°C | 550°C | 600°C | 650°C | 700°C | 750°C | 800°C |
|-----|-----|------|-------|-------|-------|-------|-------|-------|-------|-------|-------|-------|-------|-------|-------|-------|-------|
| 1   | 23  | 26   | 27    | 28    | 22    | 14    | 14    | 18    | 15    | 16    | 9     | 10    | 10    | 9     | ..... | 2     | ..... |
| 2   | 9   | 13   | 10    | 9     | 14    | 31    | 28    | 18    | 28    | 20    | 13    | 15    | 12    | 13    | 4     | 2     | ..... |
| 3   | 28  | 15   | 25    | 19    | 13    | 11    | 11    | 13    | 11    | 25    | 25    | 23    | 16    | 18    | 4     | 5     | 5     |
| 4   | 49  | 45   | 35    | 35    | 40    | 21    | 21    | 12    | 19    | 11    | 10    | 10    | 13    | 10    | 9     | 7     | 7     |
| 5   | 31  | 32   | 31    | 33    | 28    | 17    | 13    | 24    | 14    | 15    | 12    | 14    | 9     | 13    | 9     | 9     | 9     |
| 6   | 23  | 20   | 26    | 25    | 21    | 16    | 12    | 11    | 7     | 16    | 45    | 23    | 20    | 22    | 5     | 5     | 5     |
| 7   | 7   | 55   | 66    | 58    | 54    | 49    | 11    | 34    | 7     | 7     | 24    | 14    | 8     | 27    | 9     | 8     | 8     |
| 8   | 37  | 30   | 35    | 47    | 32    | 16    | 37    | 16    | 8     | 6     | 22    | 27    | 12    | 18    | 7     | 7     | 7     |
| 9   | 5   | 6    | 6     | ..... | 3     | 51    | 14    | 49    | 7     | 8     | 33    | 28    | 25    | 25    | 10    | 10    | 10    |
| 10  | 65  | 35   | 59    | 46    | 45    | 21    | 40    | 40    | 34    | 36    | 49    | 36    | 25    | 34    | 11    | 11    | 11    |
| 11  | 49* | 60*  | 49*   | 47*   | 58*   | 52    | 28    | 17    | 15    | 16    | 38    | 54    | 32    | 32    | 13    | 13    | 13    |
| 12  |     |      |       |       |       | 44*   | 41    | 6     | 49    | 54    | 28    | 30    | 66    | 53    | 12*   | 13*   | 12*   |
| 13  |     |      |       |       |       |       |       | 49    | 23    | 22    | 27    | 12    | 24    | 31    | 32    | 29    | 29    |
| 14  |     |      |       |       |       |       |       | 51    | 18    | 17    | 5*    | 11    | 11    | 12    | 20    | 22    | 22    |
| 15  |     |      |       |       |       |       |       | 29*   | 41*   | 39*   | 46    | 5*    | 18    | 15    | 35    | 31    | 31    |
| 16  |     |      |       |       |       |       |       |       | 31    | 33    | 31    | 26    | 1*    | 5*    | 19    | 21    | 21    |
| 17  |     |      |       |       |       |       |       |       | 11*   | 18*   | 25*   | 34    | 41    | 30    | 20    | 19    | 24    |
| 18  |     |      |       |       |       |       |       |       | 29    | 5     | 12    | 22*   | 32    | 32    | 17    | 17    | 17    |
| 19  |     |      |       |       |       |       |       |       | 27    | 32    | 20    | 16    | 22*   | 21*   | 25    | 27    | 24    |
| 20  |     |      |       |       |       |       |       |       |       |       |       | 24    | 15    | 18    | 27    | 23    | 23    |
| 21  |     |      |       |       |       |       |       |       |       |       |       |       | 22    | 19    | 21*   | *30   | 23*   |

\*Not assigned to any reported vibration mode.

**Table S9** Summary of fitted values of integrated area (I. A.) of various phonon modes obtained from Bi and the air annealed samples.

| No. Bi | 50°C  | 100°C | 150°C | 200°C | 250°C | 300°C  | 350°C  | 400°C  | 450°C   | 500°C  | 550°C  | 600°C  | 650°C  | 700°C  | 750°C  | 800°C   |        |
|--------|-------|-------|-------|-------|-------|--------|--------|--------|---------|--------|--------|--------|--------|--------|--------|---------|--------|
| 1      | 4552  | 14035 | 20081 | 17104 | 19660 | 46945  | 206968 | 139772 | 264039  | 180037 | 17648  | 83481  | 63696  | 68380  | .....  | 28      | .....  |
| 2      | 624   | 299   | 2150  | 1607  | 9050  | 134851 | 401264 | 109195 | 431953  | 82315  | 17944  | 78898  | 42987  | 47335  | 68     | 38      | .....  |
| 3      | 9177  | 5451  | 17035 | 7684  | 14443 | 36557  | 161052 | 97849  | 222184  | 157613 | 36421  | 147044 | 51361  | 59361  | 496    | 2274    | 1900   |
| 4      | 18383 | 16987 | 10470 | 8332  | 17502 | 35010  | 104119 | 18981  | 105374  | 133050 | 20805  | 128977 | 116978 | 118523 | 66614  | 77643   | 58608  |
| 5      | 1651  | 1617  | 2259  | 2163  | 1426  | 14208  | 29370  | 35388  | 43045   | 57586  | 7654   | 78006  | 21827  | 50594  | 101772 | 176890  | 136177 |
| 6      | 1395  | 9099  | 15980 | 8658  | 23729 | 2585   | 8892   | 2461   | 3412    | 39815  | 61937  | 76541  | 52294  | 50657  | 9871   | 18612   | 13586  |
| 7      | 89    | 9065  | 7902  | 6683  | 10219 | 12081  | 2599   | 5541   | 2510    | 3324   | 4747   | 7588   | 7726   | 9953   | 151734 | 258812  | 199632 |
| 8      | 1463  | 1801  | 736   | 1340  | 4289  | 177490 | 28773  | 238206 | 5959    | 1562   | 22523  | 244743 | 23168  | 12547  | 38621  | 96096   | 75701  |
| 9      | 121   | 257   | 318   | ..... | 111   | 87607  | 402463 | 235599 | 3092    | 6902   | 45110  | 173174 | 134700 | 160425 | 78913  | 174090  | 139057 |
| 10     | 4103  | 1522  | 7458  | 2727  | 3693  | 36623  | 480832 | 88008  | 43410   | 62841  | 114747 | 385620 | 117383 | 212848 | 120003 | 246495  | 193564 |
| 11     | 1233* | 5183* | 3677* | 2612* | 7652* | 32015  | 267898 | 24861  | 615687  | 408868 | 28486  | 348462 | 218755 | 225325 | 209476 | 446501  | 355856 |
| 12     |       |       |       |       |       | 6236*  | 16512  | 2759   | 714826  | 456733 | 19358  | 106712 | 286150 | 320767 | 11108* | 23431*  | 13603* |
| 13     |       |       |       |       |       |        |        | 16752  | 58078   | 52460  | 2253   | 1435   | 31166  | 103351 | 411103 | 832704  | 651709 |
| 14     |       |       |       |       |       |        |        | 4282   | 100257  | 58189  | 1436*  | 4063   | 4732   | 1649   | 590807 | 1023230 | 790509 |
| 15     |       |       |       |       |       |        |        | 3538*  | 167188* | 77220* | 47891  | 1195*  | 49501  | 4580   | 342036 | 485860  | 351346 |
| 16     |       |       |       |       |       |        |        |        | 54251   | 116203 | 100737 | 41940  | 3683*  | 4682*  | 73066  | 199766  | 145419 |
| 17     |       |       |       |       |       |        |        |        | 1125*   | 7526*  | 16691* | 633061 | 78699  | 52044  | 128275 | 251968  | 281265 |
| 18     |       |       |       |       |       |        |        |        | 9583    | 347    | 754    | 61076* | 296904 | 526159 | 296805 | 669892  | 537159 |
| 19     |       |       |       |       |       |        |        |        | 12142   | 11234  | 3786   | 5137   | 35779* | 43960* | 127604 | 225167  | 115444 |
| 20     |       |       |       |       |       |        |        |        |         |        |        | 29613  | 4485   | 16841  | 100123 | 165231  | 112938 |
| 21     |       |       |       |       |       |        |        |        |         |        |        |        | 15412  | 14970  | 30168* | 21545*  | 11183* |

\*Not assigned to any reported vibration mode.



**Table S10** Summary of fitted values of bandgap energy obtained from high-resolution Bi 4f XPS spectra of Bi,  $\beta$ -Bi<sub>2</sub>O<sub>3</sub> (top), and  $\gamma$ - and  $\alpha$ -Bi<sub>2</sub>O<sub>3</sub> (bottom).

| Sample                                  | Bi <sup>3+</sup> 4f <sub>7/2</sub> |       |      | BiCO <sub>x</sub> |       |      | Bi <sup>3+</sup> 4f <sub>5/2</sub> |       |      |  |  |  |
|-----------------------------------------|------------------------------------|-------|------|-------------------|-------|------|------------------------------------|-------|------|--|--|--|
|                                         | B.E.                               | A     | FWHM | B.E.              | A     | FWHM | B.E.                               | A     | FWHM |  |  |  |
| Bi                                      | 158.77                             | 16229 | 1.85 | 161.60            | 13694 | 3.91 | 163.59                             | 16441 | 1.85 |  |  |  |
| $\beta$ -Bi <sub>2</sub> O <sub>3</sub> | 158.51                             | 13451 | 1.94 | 161.19            | 23526 | 3.59 | 163.44                             | 33171 | 1.94 |  |  |  |

  

| Sample                                   | Bi <sup>3+</sup> 4f <sub>7/2</sub> |       |      | S      |       |      | Bi <sup>3+</sup> 4f <sub>5/2</sub> |       |      | S      |       |      |
|------------------------------------------|------------------------------------|-------|------|--------|-------|------|------------------------------------|-------|------|--------|-------|------|
|                                          | B.E.                               | A     | FWHM | B.E.   | A     | FWHM | B.E.                               | A     | FWHM | B.E.   | A     | FWHM |
| $\gamma$ -Bi <sub>2</sub> O <sub>3</sub> | 158.86                             | 34873 | 1.90 | 160.84 | 19040 | 2.10 | 164.19                             | 23286 | 1.90 | 166.11 | 13555 | 2.10 |
| $\alpha$ -Bi <sub>2</sub> O <sub>3</sub> | 158.92                             | 27262 | 1.80 | 160.37 | 21188 | 1.86 | 164.27                             | 19068 | 1.80 | 165.69 | 14822 | 1.86 |

**Table S11** Summary of fitted values of bandgap energy obtained from high-resolution O1 s XPS spectra of Bi,  $\beta$ -,  $\gamma$ - and  $\alpha$ -Bi<sub>2</sub>O<sub>3</sub>.

| Sample | Bi-O   |      |      | OH <sup>-</sup> |       |       | O-C    |      |      |        |       |       |
|--------|--------|------|------|-----------------|-------|-------|--------|------|------|--------|-------|-------|
|        | B.E.   | A    | FWHM | B.E.            | A     | FWHM  | B.E.   | A    | FWHM | B.E.   | A     | FWHM  |
| Bi     | 530.16 | 5462 | 2.84 | .....           | ..... | ..... | 531.82 | 2515 | 2.85 | 533.81 | 5390  | 3.21  |
| 250°C  | 529.97 | 3716 | 2.67 | .....           | ..... | ..... | 531.95 | 1534 | 2.9  | 533.0  | 13527 | 3.30  |
| 550°C  | 529.76 | 4640 | 1.70 | 530.89          | 4640  | 1.70  | 531.74 | 1715 | 2.79 | .....  | ..... | ..... |
| 700°C  | 530.19 | 7679 | 2.17 | 531.25          | 7679  | 2.17  | 531.79 | 2145 | 2.3  | .....  | ..... | ..... |

**Table S12** Summary of fitted values of bandgap energy obtained from high-resolution C1 s XPS spectra of Bi,  $\beta$ -,  $\gamma$ - and  $\alpha$ -Bi<sub>2</sub>O<sub>3</sub>.

| Sample | C-C   |      | C-O-C  |      | O-C=O  |      | C-Bi   |      | ?      |       | FWHM |
|--------|-------|------|--------|------|--------|------|--------|------|--------|-------|------|
|        | B.E.  | A    | B.E.   | A    | B.E.   | A    | B.E.   | A    | B.E.   | A     |      |
| Bi     | 284.8 | 1924 | 286.33 | 876  | 288.01 | 1228 | 289.19 | 1688 | 291.97 | 174   | 1.82 |
| 250°C  | 284.8 | 513  | 286.10 | 385  | 287.64 | 756  | 289.33 | 1788 | 292.50 | 385   | 2.01 |
| 550°C  | 284.8 | 2099 | 286.69 | 1220 | 288.49 | 808  | 289.66 | 237  | .....  | ..... | 1.87 |
| 700°C  | 284.8 | 2074 | 286.20 | 1378 | 288.61 | 839  | 290.00 | 454  | .....  | ..... | 1.83 |

**Table S13** Summary of fitted parameters to PL spectra of Bi and the air annealed samples.

| Parameters                | Bi   | 50°C  | 100°C | 150°C | 200°C | 250°C | 300°C | 350°C | 400°C | 450°C | 500°C | 550°C | 600°C | 650°C | 700°C | 750°C | 800°C |
|---------------------------|------|-------|-------|-------|-------|-------|-------|-------|-------|-------|-------|-------|-------|-------|-------|-------|-------|
| Centre<br>(nm)            | 382  | 393   | 399   | 396   | 381   | 399   | 408   | 404   | 401   | 384   | 404   | 394   | 428   | 413   | 408   | 409   | 406   |
|                           | 534  | 482   | 486   | 485   | 504   | 551   | 555   | 515   | 525   | 531   | 477   | 487   | 514   | 498   | 500   | 486   | 482   |
|                           | 593  | 586   | 586   | 583   | 593   | 595   | 589   | 585   | 588   | 588   | 587   | 588   | 588   | 585   | 584   | 582   | 585   |
|                           | 699  | 699   | 697   | 696   | 695   | 698   | 689   | 701   | 699   | 699   | 693   | 701   | 696   | 694   | 698   | 695   | 698   |
| FWHM<br>(nm)              | 36   | 43    | 54    | 58    | 45    | 50    | 84    | 55    | 76    | 16    | 39    | 57    | 76    | 73    | 67    | 66    | 58    |
|                           | 91   | 108   | 128   | 93    | 94    | 113   | 92    | 129   | 130   | 90    | 87    | 115   | 112   | 112   | 93    | 114   | 107   |
|                           | 40   | 61    | 61    | 59    | 38    | 37    | 61    | 67    | 58    | 66    | 59    | 61    | 64    | 64    | 60    | 59    | 63    |
|                           | 126  | 121   | 125   | 129   | 113   | 135   | 134   | 126   | 121   | 123   | 129   | 120   | 128   | 128   | 126   | 133   | 124   |
| Intensity<br>(Normalized) | 81   | 194   | 396   | 619   | 111   | 159   | 1835  | 533   | 572   | 33    | 141   | 259   | 2345  | 2159  | 1300  | 1853  | 1350  |
|                           | 584  | 653   | 1183  | 985   | 484   | 3614  | 10052 | 2799  | 2135  | 762   | 781   | 912   | 6702  | 7341  | 1389  | 5046  | 3088  |
|                           | 235  | 2406  | 2574  | 2770  | 286   | 258   | 5665  | 4513  | 1051  | 1933  | 3904  | 1657  | 4155  | 8285  | 4996  | 10810 | 9810  |
|                           | 6236 | 15154 | 16039 | 16324 | 4596  | 11039 | 37503 | 27231 | 9383  | 13334 | 19307 | 11936 | 22148 | 41943 | 27617 | 58359 | 49769 |

**Table S14** Summary of CIE (X, Y) coordinates and CCT values obtained from PL spectra of pure and the air annealed Bi nanoparticles (left) and ingot (right).

| Sample | Annealed Bi NPs |        |         | Sample | Annealed Bi ingots |        |         |
|--------|-----------------|--------|---------|--------|--------------------|--------|---------|
|        | CIE             |        | CCT (K) |        | CIE                |        | CCT (K) |
|        | x               | y      |         |        | x                  | y      |         |
| Bi     | 0.4521          | 0.4048 | 2766    | Bi     | 0.3215             | 0.3731 | 5915    |
| 50 °C  | 0.506           | 0.3955 | 2065    | 100 °C | 0.3279             | 0.4053 | 5655    |
| 100 °C | 0.4905          | 0.3903 | 2178    | 200 °C | 0.3264             | 0.3913 | 5713    |
| 150 °C | 0.5019          | 0.3932 | 2087    | 250 °C | 0.3104             | 0.3035 | 6905    |
| 200 °C | 0.4604          | 0.366  | 2333    | 300 °C | 0.3454             | 0.3604 | 5018    |
| 250 °C | 0.4291          | 0.4401 | 3406    | 400 °C | 0.2866             | 0.2968 | 8982    |
| 300 °C | 0.4796          | 0.445  | 2693    | 500 °C | 0.2944             | 0.2997 | 8200    |
| 350 °C | 0.4815          | 0.4098 | 2418    | 600 °C | 0.3206             | 0.3195 | 6129    |
| 400 °C | 0.4315          | 0.3943 | 3012    | 700 °C | 0.337              | 0.341  | 5301    |
| 450 °C | 0.4871          | 0.4204 | 2430    |        |                    |        |         |
| 500 °C | 0.5006          | 0.3879 | 2063    |        |                    |        |         |
| 550 °C | 0.4759          | 0.3819 | 2274    |        |                    |        |         |
| 600 °C | 0.3989          | 0.3775 | 3535    |        |                    |        |         |
| 650 °C | 0.439           | 0.385  | 2805    |        |                    |        |         |
| 700 °C | 0.5014          | 0.3966 | 2115    |        |                    |        |         |
| 750 °C | 0.4895          | 0.3926 | 2205    |        |                    |        |         |
| 800 °C | 0.4949          | 0.3946 | 2164    |        |                    |        |         |

**Table S15** Summary of various phase transformation reported in the literature.

| Phase Transformation | Description and Reference                                                                                                                                                                                                                                                                                                              |
|----------------------|----------------------------------------------------------------------------------------------------------------------------------------------------------------------------------------------------------------------------------------------------------------------------------------------------------------------------------------|
|                      | <p>Oxidation of Bi in the air leads to the formation of <math>\alpha</math>-, <math>\beta</math>-, and <math>\delta</math>-<math>\text{Bi}_2\text{O}_3</math> because of the coherent relationship between Bi and <math>\text{Bi}_2\text{O}_3</math>. Heating rate: <math>1\text{ }^\circ\text{C}/\text{min}</math>.<sup>3-5</sup></p> |
|                      | <p>Thermal oxidation of Bi nanotube array leads to the formation of <math>\beta</math>-<math>\text{Bi}_2\text{O}_3</math> nanotube array.<sup>6</sup></p>                                                                                                                                                                              |
|                      | <p>The anodic bismuth trioxide layers were prepared via anodization of vacuum deposited Bi film in a citric acid-based electrolyte.<sup>7</sup></p>                                                                                                                                                                                    |
|                      | <p>Thermal oxidation induced phase transformation of Bi thin film. Heating rate: <math>1\text{ }^\circ\text{C}/\text{min}</math>.<sup>8</sup></p>                                                                                                                                                                                      |
|                      | <p>A template heat-treatment induced conversion of Bi nanowire array (diameter 60 nm) to Bi-<math>\text{Bi}_2\text{O}_3</math> core-shell nanowires and <math>\text{Bi}_2\text{O}_3</math> nanotubes (diameter 75 nm).<sup>9</sup></p>                                                                                                 |
|                      | <p>Structural evolution of <math>\text{Bi}_2\text{O}_3</math> prepared by thermal oxidation of Bi nanoparticles in the air. Heating and cooling rate: 5 and <math>10\text{ }^\circ\text{C}/\text{min}</math>.<sup>10</sup></p>                                                                                                         |
|                      | <p><b>Current work:</b> The air annealed Bi nanoparticles leads to the structural evolution of <math>\text{Bi}_2\text{O}_3</math>.</p>                                                                                                                                                                                                 |

|                                                                                     |                                                                                                                                                                                                                                                                                                                                           |
|-------------------------------------------------------------------------------------|-------------------------------------------------------------------------------------------------------------------------------------------------------------------------------------------------------------------------------------------------------------------------------------------------------------------------------------------|
| 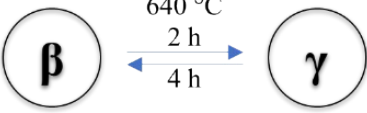   | <p>Bi<sub>2</sub>O<sub>3</sub>-BiFeO<sub>3</sub> Glass-ceramic sample<sup>11</sup></p>                                                                                                                                                                                                                                                    |
|    | <p>Impact of annealing in the air on phase transformation from <math>\beta</math>-Bi<sub>2</sub>O<sub>3</sub> nanotube (diameter 5.5 nm) to <math>\alpha</math>-Bi<sub>2</sub>O<sub>3</sub> microcrystal (800 nm).<sup>12</sup></p>                                                                                                       |
|   | <p>The solid-state transition of <math>\beta</math>-Bi<sub>2</sub>O<sub>3</sub> nanoparticles to bulk-phase evaluated using in situ XRD.</p>                                                                                                                                                                                              |
|    | <p>The size effect (nanowire diameters: 10 nm <math>\beta</math>-Bi<sub>2</sub>O<sub>3</sub>, 100 nm <math>\alpha</math>-Bi<sub>2</sub>O<sub>3</sub>) for <math>\delta</math> to liquid (l) phase transition but not the <math>\alpha</math> or <math>\beta</math> to <math>\delta</math> phase transition in nanoscale.<sup>13</sup></p> |
|    | <p>Bi<sub>2</sub>O<sub>3</sub>/Bi<sub>2</sub>SiO<sub>5</sub> fabricated via a facile one-step synthesis using Bi(NO<sub>3</sub>)<sub>3</sub> and nano-SiO<sub>2</sub> as precursors.<sup>14</sup></p>                                                                                                                                     |
|   | <p>Rod-like <math>\alpha</math>-Bi<sub>2</sub>O<sub>3</sub> and tetrahedral <math>\gamma</math>-Bi<sub>2</sub>O<sub>3</sub> particles were fabricated by a facile solution crystallization method without any surfactants and/or templates.<sup>15</sup></p>                                                                              |
|  | <p>Polymorphs phase transformation of Bi<sub>2</sub>O<sub>3</sub> nanoparticles by the mechanical alloying method.<sup>16</sup></p>                                                                                                                                                                                                       |



|                                                                                    |                                                                                                                                                                                                                                                                                                    |
|------------------------------------------------------------------------------------|----------------------------------------------------------------------------------------------------------------------------------------------------------------------------------------------------------------------------------------------------------------------------------------------------|
| 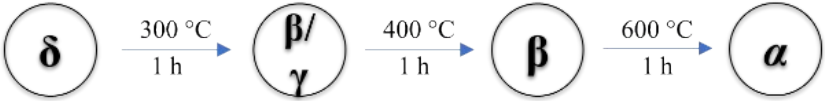 | <p>Thermal oxidation of the nanocrystalline <math>\delta</math>-<math>\text{Bi}_2\text{O}_3</math> thin-film.<sup>17</sup></p>                                                                                                                                                                     |
|   | <p><math>\gamma</math>-<math>\text{Bi}_2\text{O}_3</math> tetrahedra (built up of ultra-thin nanosheets via layer-by-layer self-assembly) were etched using <math>\text{NaBH}_4</math> at 90 °C resulting in the formation of Bi nanoparticles.<sup>18</sup></p>                                   |
|   | <p>Reduction of <math>\delta</math>-<math>\text{Bi}_2\text{O}_3</math> to Bi film using electrolyte gating for 10 min.<sup>19</sup></p>                                                                                                                                                            |
|   | <p>Electrochemical reduction of <math>\delta</math>-<math>\text{Bi}_2\text{O}_3</math> to granular Bi thin film.<sup>20</sup></p>                                                                                                                                                                  |
|   | <p>Annealing of <math>\delta</math>-<math>\text{Bi}_2\text{O}_3</math> in a dynamic vacuum (<math>P = 1.33 \text{ Pa}</math>) initially at 750 °C for 6.5 h and then at 780 °C for 1.5 h leads to phase transformation to <math>\gamma</math>-<math>\text{Bi}_2\text{O}_3</math>.<sup>21</sup></p> |

## Notes and references

1. X. Chen, J. Dai, G. Shi, L. Li, G. Wang, and H. Yang, *J. Alloys Compd.*, 2015, **649**, 872-877.
2. J. A. H. Dreyer, S. Pokhrel, J. Birkenstock, M. G. Hevia, M. Schowalter, A. Rosenauer, A. Urakawa, W. Y. Teoh and L. Mädler, *CrystEngComm*, 2016, **18**, 2046-2056.
3. C.-C. Huang, T.-Y. Wen and K.-Z. Fung, *Mater. Res. Bull.*, 2006, **41**, 110-118.
4. C. C. Huang and K. Z. Fung, *Mater. Res. Bull.*, 2006, **41**, 1604-1611.
5. C. C. Huang, I. C. Leu and K. Z. Fung, *Electrochem. Solid St. Lett.*, 2005, **8**, A204.
6. B. Yang, M. Mo, H. Hu, C. Li, X. Yang, Q. Li and Y. Qian, *Eur. J. Inorg. Chem.*, 2004, **2004**, 1785-1787.
7. M. Ahila, J. Dhanalakshmi, J. C. Selvakumari and D. P. Padiyan, *Mater. Res. Express*, 2016, **3**, 105025.
8. T. P. Gujar, V. R. Shinde and C. D. Lokhande, *Appl. Surf. Sci.*, 2008, **254**, 4186-4190.
9. L. Li, Y.-W. Yang, G.-H. Li and L.-D. Zhang, *Small*, 2006, **2**, 548-553.
10. A. J. Salazar-Pérez, M. A. Camacho-López, R. A. Morales-Luckie, V. Sánchez-Mendieta, F. Ureña-Núñez and J. Arenas-Alatorre, *SMCSYV*, 2005, **18**, 4-8.
11. F. H. Margha, E. K. Radwan, M. I. Badawy and T. A. Gad-Allah, *ACS Omega*, 2020, **5**, 14625-14634.
12. H. Lu, B. Dong, S. Wang, L. Zhao, Z. Xu, L. Wan and J. Li, *Phys. Status Solidi*, 2012, **209**, 2157-2160.
13. Y. Qiu, M. Yang, H. Fan, Y. Zuo, Y. Shao, Y. Xu, X. Yang and S. Yang, *Mater. Lett.*, 2011, **65**, 780-782.

14. H. Lu, Q. Hao, T. Chen, L. Zhang, D. Chen, C. Ma, W. Yao and Y. Zhu, *Appl. Catal. B-Environ.*, 2018, **237**, 59-67.
15. G. Liu, S. Li, Y. Lu, J. Zhang, Z. Feng and C. Li, *J. Alloys Compd.*, 2016, **689**, 787-799.
16. S. Bandyopadhyay, S. Dutta, A. Dutta and S. K. Pradhan, *Cryst. Growth Des.*, 2018, **18**, 6564-6572.
17. H. T. Fan, S. S. Pan, X. M. Teng, C. Ye and G. H. Li, *J. Phys. D*, 2006, **39**, 1939-1943.
18. Y. Wang and Y. Li, *J. Colloid Interf. Sci.*, 2015, **454**, 238-244.
19. L. Fan, Y. Zhu, Z. Wang, S. Zhao, Z. Liu, L. Zhu, X. Wang and Q. Zhang, *Appl. Phys. Lett.*, 2019, **115**, 261601.
20. Z. He, J. A. Koza, Y.-C. Liu, Q. Chen and J. A. Switzer, *RSC Adv.*, 2016, **6**, 96832-96836.
21. L. A. Klinkova, V. I. Nikolaichik, N. V. Barkovskii and V. K. Fedotov, *Russ. J. Inorg. Chem.*, 2007, **52**, 1822-1829.
